# Supplementary material for: Online information in Spanish on probiotics, yoghurt, kefir, kombucha, fibre and prebiotics: an analysis of the quality of information and the certainty of the evidence supporting health claims
Source: PubMed Central journal article supplement — BMJ Open. 2022 Aug 2;12(8):e063316. doi: 10.1136/bmjopen-2022-063316 (PMC9352994; doi:10.1136/bmjopen-2022-063316), 2022-08-02
Supplement: bmjopen-2022-063316.draft_revisions.pdf [file bmjopen-2022-063316.draft_revisions.pdf]

# BMJ Open

BMJ Open is committed to open peer review. As part of this commitment we make the peer review history of every article we publish publicly available.

When an article is published we post the peer reviewers' comments and the authors' responses online. We also post the versions of the paper that were used during peer review. These are the versions that the peer review comments apply to.

The versions of the paper that follow are the versions that were submitted during the peer review process. They are not the versions of record or the final published versions. They should not be cited or distributed as the published version of this manuscript.

BMJ Open is an open access journal and the full, final, typeset and author-corrected version of record of the manuscript is available on our site with no access controls, subscription charges or pay-per-view fees (<http://bmjopen.bmj.com>).

If you have any questions on BMJ Open's open peer review process please email [info.bmjopen@bmj.com](mailto:info.bmjopen@bmj.com)

# BMJ Open

**Online information in Spanish on probiotics, yoghurt, kefir, kombucha, fibre and prebiotics: an analysis of information quality and certainty of evidence of health claims**

|                               |                                                                                                                                                                                                                                                                                                                                                                                                                                                       |
|-------------------------------|-------------------------------------------------------------------------------------------------------------------------------------------------------------------------------------------------------------------------------------------------------------------------------------------------------------------------------------------------------------------------------------------------------------------------------------------------------|
| Journal:                      | <i>BMJ Open</i>                                                                                                                                                                                                                                                                                                                                                                                                                                       |
| Manuscript ID                 | bmjopen-2022-063316                                                                                                                                                                                                                                                                                                                                                                                                                                   |
| Article Type:                 | Original research                                                                                                                                                                                                                                                                                                                                                                                                                                     |
| Date Submitted by the Author: | 28-Mar-2022                                                                                                                                                                                                                                                                                                                                                                                                                                           |
| Complete List of Authors:     | Prados-Bo, Andreu; Pompeu Fabra University, Department of Communication; Ramon Llull University, Blanquerna School of Health Science<br>Rabassa , Montserrat; Eurecat Centre Tecnològic de Catalunya, Unitat de Nutrició i Salut<br>Bosch, Mireia; Eurecat Centre Tecnològic de Catalunya, Unitat de Nutrició i Salut<br>Casino, Gonzalo; Pompeu Fabra University, Department of Communication; Biomedical Research Institute Sant Pau (IIB Sant Pau) |
| Keywords:                     | NUTRITION & DIETETICS, PUBLIC HEALTH, GASTROENTEROLOGY                                                                                                                                                                                                                                                                                                                                                                                                |
|                               |                                                                                                                                                                                                                                                                                                                                                                                                                                                       |

SCHOLARONE™  
Manuscripts

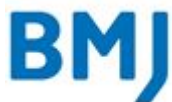

I, the Submitting Author has the right to grant and does grant on behalf of all authors of the Work (as defined in the below author licence), an exclusive licence and/or a non-exclusive licence for contributions from authors who are: i) UK Crown employees; ii) where BMJ has agreed a CC-BY licence shall apply, and/or iii) in accordance with the terms applicable for US Federal Government officers or employees acting as part of their official duties; on a worldwide, perpetual, irrevocable, royalty-free basis to BMJ Publishing Group Ltd ("BMJ") its licensees and where the relevant Journal is co-owned by BMJ to the co-owners of the Journal, to publish the Work in this journal and any other BMJ products and to exploit all rights, as set out in our [licence](#).

The Submitting Author accepts and understands that any supply made under these terms is made by BMJ to the Submitting Author unless you are acting as an employee on behalf of your employer or a postgraduate student of an affiliated institution which is paying any applicable article publishing charge ("APC") for Open Access articles. Where the Submitting Author wishes to make the Work available on an Open Access basis (and intends to pay the relevant APC), the terms of reuse of such Open Access shall be governed by a Creative Commons licence – details of these licences and which [Creative Commons](#) licence will apply to this Work are set out in our licence referred to above.

Other than as permitted in any relevant BMJ Author's Self Archiving Policies, I confirm this Work has not been accepted for publication elsewhere, is not being considered for publication elsewhere and does not duplicate material already published. I confirm all authors consent to publication of this Work and authorise the granting of this licence.

## Title page

Online information in Spanish on probiotics, yoghurt, kefir, kombucha, fibre and prebiotics: an analysis of information quality and certainty of evidence of health claims

**First author:** Andreu Prados-Bo[1, 2]

1 Department of Communication, Pompeu Fabra University, Barcelona, Spain.

2 Blanquerna School of Health Science, Ramon Llull University, Barcelona, Spain.

<https://orcid.org/0000-0003-4393-9723>

**Second author:** Montserrat Rabassa[3]

3 Eurecat, Centre Tecnològic de Catalunya, Unitat de Nutrició i Salut, 43204 Reus, Spain.

<https://orcid.org/0000-0002-0276-6726>

**Third author:** Mireia Bosch[3]

3 Eurecat, Centre Tecnològic de Catalunya, Unitat de Nutrició i Salut, 43204 Reus, Spain.

<https://orcid.org/0000-0003-4795-2669>

**Fourth author:** Gonzalo Casino[1, 4]

1 Department of Communication, Pompeu Fabra University, Barcelona, Spain.

4 Iberoamerican Cochrane Centre, Biomedical Research Institute Sant Pau (IIB Sant Pau), Barcelona, Spain.

<https://orcid.org/0000-0003-1872-4130>

### Corresponding authors:

Andreu Prados-Bo

Email: [andreu@andreuprados.com](mailto:andreu@andreuprados.com)

Address: Department of Communication (Scientific Communication Research Group – Observatory of Scientific Communication), Universitat Pompeu Fabra, Roc Boronat 138, 08018 Barcelona, Spain.

Gonzalo Casino

Email: [gonzalo.casino@upf.edu](mailto:gonzalo.casino@upf.edu)

Address: Department of Communication (Scientific Communication Research Group – Observatory of Scientific Communication), Universitat Pompeu Fabra, Roc Boronat 138, 08018 Barcelona, Spain.

**Word count** (excluding the title page, abstract, tables, figures, acknowledgments, contributions and references): **4,564**

## ABSTRACT

### Objective

To analyse certainty of evidence supporting health claims about probiotics, yoghurt, kefir, kombucha, fibre and prebiotics, and to assess the quality of online information in Spanish.

### Methods

We analysed the first 20 webpages returned by searching six popular search phrases in Spanish relating to probiotics, yoghurt, kefir, kombucha, fibre and prebiotics on Google.es and coded them for typology and health claims. We analysed certainty of evidence for health claims from systematic reviews. Information quality was assessed according to 10 criteria, where a webpage: mentions scientific publications and reports their conclusions; quantifies relative and absolute effects; acknowledges some limitations; discusses certainty of evidence; reports the potential harms, alternatives and costs of the intervention; and does not argue based on personal experiences.

### Results

There were 114 webpages eligible for analysis. Gastrointestinal health (86.0%), vague claims relating to maintaining health (57.9%), cardiovascular health (53.5%) and immune system health (50.9%) were the most widely mentioned topics. Half of health claims (52.6%, 70/133) were supported by evidence from systematic reviews. Probiotics had the highest number of health claims supported by evidence and kombucha the lowest. The highest certainty was found for antibiotic-associated diarrhoea (moderate) in probiotics and yoghurt, infectious diarrhoea and hepatic encephalopathy (moderate) in prebiotics, and cardiovascular health (high to moderate) and colorectal cancer (moderate) in fibre. On a scale of 0 to 10, the median information quality score for all webpages was 3. Only 18.4% of webpages reported study conclusions, 7.9% quantified the effects, 28.9% acknowledged some limitations in the research and 42.1% reported potential harms.

### Conclusions

Most online health claims for dietary interventions intended for improving health through the gut microbiome are supported by low or very low certainty of evidence. Online information does not align with the evidence and is incomplete or unbalanced.

Keywords: diet, probiotics, fermented foods, fibre, prebiotics, health claims, online health information, quality of information, certainty of evidence.

## STRENGTHS AND LIMITATIONS OF THIS STUDY

- This is the first study that uses certainty of evidence to analyse online information on probiotics, fermented foods, fibre and prebiotics.
- We propose 10 criteria (scored from 0 to 10) for assessing information quality, selected on the basis of the first systematic review of the quality of news reports on the effects of health interventions.
- The content analysis only focuses on some popular searches and the top 20 search results on Google.
- The study is limited in scope, since it only focuses on Spanish-language webpages and does not analyse information available on social media channels.

## INTRODUCTION

Research into the microbial ecosystem residing in the gastrointestinal tract, which is collectively known as the gut microbiome, is commanding increasing attention among medical audiences and the general public.[1-4] While the microbiome is now often thought of as a virtual organ of the body due to its influence in many areas of human health, from immunity to energy metabolism and mental health,[5-7] its causal involvement in diseases is mostly unresolved.[8] Recent large-scale studies have shown that diet is among the most important environmental factors to which the gut microbiome is exposed and by which it is modified on a daily basis, even outweighing host genetics.[9-13]

Contemporary audiences are increasingly turning to the internet as a source of information about health and nutrition.[14, 15] Google is the most widely used search engine[16, 17] and one in 20 Google searches seek health-related information.[18] The health and nutrition-related information disseminated by online resources may influence health perception and food practices,[19-22] and the online space in particular has fuelled the promotion of microbiome-related interventions for maintaining health and quality of life.[23] However, information on the microbiome in online resources or websites (e.g., newspapers and Google searches) is often misleading, does not always report limitations and tends to simplify or exaggerate the benefits of microbiome-based interventions.[1, 4, 24-27] That has led to the microbiome being oversold as the main cause of all health and illness, in a phenomenon dubbed 'microbiomania'. [28] Despite the huge amount of health-related information that can be accessed online, there is no universal tool available for evaluating the quality of information on the effects of health interventions. Furthermore, the authors have not found any studies that explore the quality of online information on microbiome-related interventions.

As for health and nutrition in general, the internet is a major source of information among the general population about probiotic and fermented food use for the benefit of gut health.[29-31] During the COVID-19 pandemic, news and commercial websites frequently mentioned the microbiome and gut health in relation to immune boosting strategies, which, nevertheless, were lacking in evidence.[32] Two previous content analyses of webpages on probiotics in English showed poor quality and objective information, with commercial websites providing the lowest score.[33, 34] Whether

1  
2  
3 those findings can extrapolate to online information for other dietary strategies such as  
4 fermented foods, fibre and prebiotics, widely promoted as influencing human health  
5 through their effect on the gut microbiome, is unknown.  
6  
7

8 This study addresses both the scientific basis and the quality of the online information  
9 on gut microbiome-related interventions to which the public is exposed. Our first  
10 objective was to analyse certainty of evidence from systematic reviews (SRs) that  
11 support health claims regarding probiotics, yoghurt, kefir, kombucha, fibre and  
12 prebiotics in the top 20 indexed webpages in Spanish. We focused on such interventions  
13 for two reasons. First, most of the elements under focus (i.e., probiotics, yoghurt, kefir,  
14 fibre and prebiotics) have been studied in at least one human interventional study.[6,  
15 30, 35, 36] Second, it was observed through an analysis on Google Trends[37] that those  
16 topics had been increasingly subject to consumer interest from 2010 onwards, while  
17 becoming relatively stable between 2019 and 2021. Our second objective was to  
18 develop an overall score based on 10 criteria for evaluating the quality of information,  
19 according to intervention and webpage typology.  
20  
21  
22  
23

## 24 **METHODS**

### 25 **Google searches and selection criteria**

26  
27  
28 In line with Neunez *et al.*,[34] we conducted searches on <https://google.es> using the  
29 Google Chrome browser and employing phrases based on search-term popularity as  
30 provided by AnswerThePublic.[38] The chosen phrases were: 'por que tomar  
31 probioticos', 'qué yogur tiene más probióticos', 'por que tomar kefir', 'por que tomar  
32 kombucha', 'fibra beneficios' and 'que son prebioticos y para que sirven'. The searches  
33 took place in August 2021 in Tarragona, Spain. We decided to choose phrases containing  
34 words without accents because, according to Google Trends,[37] that is the most  
35 common way in which users search. Consequently, the results returned are what most  
36 users would find (see dataset available from the FigShare repository for the relative  
37 popularity of search terms used). Before searching, we logged out from any Google  
38 accounts and cleared caches and browsing histories to limit any personalization of the  
39 search results.  
40  
41  
42  
43

44 Since consumers' online information searches are typically limited to initial search  
45 results,[39, 40] we limited our sample to the first 20 uniform resource locators (URLs)  
46 returned on the search engine results page (SERP). All webpages written in Spanish and  
47 providing information on the interventions of interest were included. Webpages that  
48 were irrelevant (i.e., the main focus was not the searched-for intervention), videos  
49 lasting more than five minutes, retail sites intended for direct purchase and  
50 advertisements were all excluded.  
51  
52  
53

### 54 **Webpage typology**

55  
56 We coded the content of the webpage linked to the URL, but not the content provided  
57 in the hyperlinks to other webpages. One author (APB) downloaded the webpage texts  
58 as individual PDF files, deleting any reference to source or authors, and coded the  
59  
60

1  
2  
3 webpages according to Neunez *et al.*'s typology: commercial (C), news (N), health portal  
4 (HP), professional (P), governmental (G), non-profit organisation (NP), scientific journal  
5 (SJ) and other (O) (see dataset available from the FigShare repository for examples of  
6 the classification).[34]  
7  
8

### 9 **Health claims and certainty of evidence supporting them**

10  
11 Two authors (MB and GC) coded the health claims relating to each intervention  
12 (gastrointestinal health, immune system health, cardiovascular health, cancer, mental  
13 disorders, urogenital disorders and other). 'Other' was categorised when the webpage  
14 stated the intervention was valuable for general health (i.e., using general phrasing such  
15 as "helps maintain health or quality of life", "manages stress", "improves sleep", etc.),  
16 skin health (including cosmetic and skin disorders such as eczema and psoriasis) and  
17 respiratory disorders. APB coded specific indications within each health claim topic  
18 mentioned in the webpages. We also noted when an article on a webpage made a clear  
19 recommendation to consume or avoid the food or supplement and included the advice  
20 to consult a healthcare professional.  
21  
22  
23  
24

25 To identify which health claims were supported by evidence from SRs, we conducted a  
26 search of SRs in PubMed and the Cochrane Database of Systematic Reviews in December  
27 2021. SRs were chosen since they gather and analyse all studies that answer the  
28 research question and meet inclusion criteria.[41] We selected SRs that evaluated  
29 certainty of evidence using the GRADE approach, which is an established methodology  
30 for classifying certainty of evidence for each outcome of interest as high, moderate, low  
31 or very low.[42] The claims about the effect (beneficial/harmful/no effect) and certainty  
32 of evidence (high/moderate/low/very low)[43] were coded by two authors (APB and  
33 MR). When more than one SR was obtained, we prioritized the most recent and for two  
34 SRs published the same year, we prioritized the Cochrane SR.[44] If certainty of evidence  
35 differed across outcomes stated in webpages for the same intervention, overall  
36 certainty of evidence was understood as the lowest GRADE classification registered.[44]  
37 When the certainty for an outcome was not reported, the results were contradictory or  
38 effects could not be estimated, we coded the effect as uncertain.  
39  
40  
41  
42

### 43 **Quality of information**

44  
45 MB and GC separately analysed the quality of online information based on whether it  
46 met the following 10 criteria (selected on the basis of the only available SR of the quality  
47 of information on health interventions and two other relevant papers)[45-47]: 1)  
48 provides references or links to scientific publications; 2) explains the conclusions of  
49 scientific publications; 3) quantifies relative effects; 4) quantifies absolute effects; 5)  
50 acknowledges some research limitations (e.g., preliminary results, small studies,  
51 conflicts of interests and differing results between studies); 6) generally discusses  
52 certainty of evidence (e.g., aligning wording depending on whether the studies are  
53 observational or experimental);[48] 7) reports potential harms; 8) reports on available  
54 alternatives; 9) discusses intervention costs; and 10) does not make arguments based  
55 on personal experiences or anecdotes. For each criterion, the story was given a rating  
56 of 'satisfactory' or 'unsatisfactory'.  
57  
58  
59  
60



1  
2  
3  
4 All discrepancies in coding were resolved through discussion with a third author (APB)  
5 so that the final concordance was 100%. As there were only two raters rating the same  
6 sample, Cohen's kappa was used to calculate inter-rater agreement. Data are reported  
7 as kappa and its 95% CI. We considered a kappa of between 0.41 and 0.60 as a  
8 'moderate' agreement, between 0.61 and 0.80 as a 'substantial' agreement and  
9 between 0.81 and 1.00 as an 'almost perfect' one.[49]  
10  
11

## 12 **Statistical analysis**

13  
14  
15 Categorical variables were described by their absolute frequencies and percentages and  
16 continuous variables were reported as median and interquartile range (IQR) assuming  
17 the data did not fit a normal distribution, which was verified using the Shapiro-Wilk test.  
18  
19

20 We used Fisher's exact test to compare webpage typologies and the  $\chi^2$  test applying a  
21 Bonferroni correction to compare portrayals of health claims. We used a non-parametric  
22 Kruskal-Wallis test to compare information quality score in different interventions and  
23 webpage typologies. Statistical significance was set at  $p < 0.05$  and the actual p value is  
24 reported in the results section for each comparison. Version 3.5.2 of the R software  
25 (SPSS Inc., Chicago, IL, USA) and version 4.7.0.0 of the Joinpoint Regression Program  
26 were used for all analysis work.  
27  
28

## 29 **Patient and public involvement**

30  
31 No patient involved.  
32  
33

## 34 **RESULTS**

35  
36  
37 After excluding 6 webpages (3 irrelevant webpages, 1 long video and 2 online shops), a  
38 total of 114 webpages were eligible for analysis. The two primary types of webpages  
39 were commercial (23.7%, 27/114) and news webpages (23.7%, 27/114), followed by  
40 professional webpages (hospitals, universities and healthcare professionals) (14.0%,  
41 16/114) and health portals (12.3%, 14/114). All other eligible webpage typologies  
42 accounted for <10%. Five webpages corresponded to scientific publications relating to  
43 fibre (2.6%, 3/114) and prebiotics (1.8%, 2/114).  
44  
45

## 46 **Certainty of evidence of health claims**

47  
48  
49 All the webpages discussed interventions in relation to at least one health claim. In total,  
50 there were 133 different health claims for which probiotics, yoghurt, kefir, kombucha,  
51 fibre and prebiotics were portrayed as beneficial (see dataset available from the  
52 FigShare repository for a complete list). The most frequently reported reason for eating  
53 the food or taking the supplement was to reverse an altered gut microbiome (i.e.,  
54 'dysbiosis') secondary to an unbalanced diet or stressful lifestyle, treatment with  
55 antibiotics or disease. The four primary and most widely portrayed health claim topics  
56 for all interventions were gastrointestinal health (86.0%, 98/114), vague claims about  
57 maintaining or improving health without any reference to a specific condition ('Other')  
58  
59  
60

(57.9%, 66/114), cardiovascular health (53.5%, 61/114) and immune system health (i.e., infections, allergies, boosting the immune system) (50.9%, 58/114). The immune system-related health claims for kefir were overrepresented compared to fibre ( $p=0.008$ ). For fibre, the overrepresentation of health claims related to cardiovascular diseases was higher and statistically significant compared to probiotics ( $p=0.004$ ) and the overrepresentation of health claims related to cancer was higher and statistically significant compared to probiotics ( $p=0.009$ ) and prebiotics ( $p=0.044$ ). The overrepresentation of general health claims ('Other') for kombucha was higher and statistically significant compared to fibre ( $p=0.002$ ) and prebiotics ( $p=0.016$ ) (Figure 1).

[Figure 1]

Of the total of 133 health claims, only half (52.6%, 70/133) were supported by evidence from SRs. Probiotics (54.7%, 29/53), yoghurt (42.6%, 20/47) and fibre (37.1%, 13/35) had the highest number of online health claims supported by evidence from SRs. None of the 55 online health claims for kombucha was supported by evidence from SRs (Figure 2).

[Figure 2]

The health claims that appeared on the greatest number of webpages were not necessarily the ones with the highest certainty of evidence (Table 1). In the context of gastrointestinal health, the highest certainty of evidence was found for the prevention of antibiotic-associated diarrhoea for probiotics and yoghurt (moderate certainty of evidence) and the prevention and treatment of infectious diarrhoea and hepatic encephalopathy for prebiotics (moderate certainty of evidence). The prevention of acute otitis media was the immune system-related health claim supported by moderate evidence for probiotics and yoghurt. Fibre was the intervention with the highest number of online health claims supported by high (reduction of cholesterol and triglyceride levels) to moderate (reduction in obesity, type 2 diabetes, cardiovascular disease mortality, hypertension, coronary heart disease incidence and colorectal cancer incidence) certainty of evidence.

Table 1. Effect and certainty of evidence in systematic reviews supporting online health claims for probiotics, yoghurt, kefir, kombucha, fibre and prebiotics.

| Intervention            | Health claim                      | # of webpages | Effect*    | Certainty of evidence <sup>#</sup> |
|-------------------------|-----------------------------------|---------------|------------|------------------------------------|
| Probiotics <sup>a</sup> | <b>Gastrointestinal health</b>    |               |            |                                    |
|                         | Antibiotic-associated diarrhoea   | 15            | Favourable | Moderate                           |
|                         | Irritable bowel syndrome          | 13            | No effect  | Low                                |
|                         | Infectious diarrhoea              | 11            | Uncertain  | Very low                           |
|                         | Ulcerative colitis                | 8             | Uncertain  | Very low                           |
|                         | Constipation <sup>b</sup>         | 7             | Favourable | Low                                |
|                         | Crohn's disease                   | 5             | No effect  | Very low                           |
|                         | Abdominal distension and bloating | 4             | No effect  | Low                                |
|                         | Necrotising enterocolitis         | 4             | Favourable | Moderate                           |
|                         | Infantile colic                   | 3             | Favourable | Low                                |
| Pouchitis               | 3                                 | Uncertain     | Very low   |                                    |

|                      |                                           |    |            |          |
|----------------------|-------------------------------------------|----|------------|----------|
|                      | Non-alcohol-related fatty liver disease   | 2  | Uncertain  | Very low |
|                      | Tooth decay                               | 2  | Favourable | Low      |
|                      | Periodontal disease                       | 2  | Uncertain  | Very low |
|                      | <i>C. difficile</i> -associated diarrhoea | 1  | Favourable | Low      |
|                      | Hepatic encephalopathy                    | 1  | Favourable | Low      |
|                      | <b>Immune system health</b>               |    |            |          |
|                      | Allergies                                 | 7  | No effect  | Very low |
|                      | Vulvovaginal candidiasis                  | 7  | Favourable | Very low |
|                      | Urinary tract infections                  | 6  | No effect  | Low      |
|                      | Otitis                                    | 3  | Favourable | Moderate |
|                      | <b>Cardiovascular health</b>              |    |            |          |
|                      | Obesity                                   | 2  | No effect  | Very low |
|                      | Hypertension                              | 2  | Favourable | Very low |
|                      | Gestational diabetes                      | 1  | No effect  | Low      |
|                      | <b>Mental disorders</b>                   |    |            |          |
|                      | Anxiety                                   | 4  | Uncertain  | Very low |
|                      | Depression                                | 3  | Uncertain  | Very low |
|                      | <b>Other</b>                              |    |            |          |
|                      | Atopic dermatitis                         | 5  | Uncertain  | Very low |
|                      | Upper respiratory tract infections        | 6  | Favourable | Very low |
|                      | Stress symptoms                           | 2  | No effect  | Very low |
|                      | Asthma                                    | 1  | No effect  | Very low |
|                      | Mastitis                                  | 1  | Uncertain  | Low      |
| Yoghurt <sup>a</sup> | <b>Gastrointestinal health</b>            |    |            |          |
|                      | Infectious diarrhoea                      | 6  | Uncertain  | Very low |
|                      | Constipation <sup>b</sup>                 | 5  | Favourable | Low      |
|                      | Antibiotic-associated diarrhoea           | 4  | Favourable | Moderate |
|                      | Irritable bowel syndrome                  | 3  | No effect  | Low      |
|                      | Abdominal distension and bloating         | 2  | No effect  | Low      |
|                      | Ulcerative colitis                        | 1  | Uncertain  | Very low |
|                      | Crohn's disease                           | 1  | No effect  | Very low |
|                      | Necrotising enterocolitis                 | 1  | Favourable | Moderate |
|                      | <b>Immune system health</b>               |    |            |          |
|                      | Otitis                                    | 3  | Favourable | Moderate |
|                      | Allergies                                 | 1  | No effect  | Very low |
|                      | <b>Cardiovascular health</b>              |    |            |          |
|                      | Obesity                                   | 6  | No effect  | Very low |
|                      | Hypertension                              | 2  | Favourable | Very low |
|                      | <b>Mental disorders</b>                   |    |            |          |
|                      | Anxiety                                   | 2  | Uncertain  | Very low |
|                      | Depression                                | 2  | Uncertain  | Very low |
|                      | Alzheimer's disease                       | 1  | No effect  | Very low |
|                      | <b>Other</b>                              |    |            |          |
|                      | Stress symptoms                           | 1  | No effect  | Very low |
|                      | Abdominal pain                            | 1  | No effect  | Low      |
|                      | Upper respiratory tract infections        | 1  | Favourable | Very low |
|                      | Cystic fibrosis                           | 1  | No effect  | Low      |
|                      | Reduction in blood urea levels            | 1  | Favourable | Very low |
| Kefir                | <b>Gastrointestinal health</b>            |    |            |          |
|                      | Ulcerative colitis                        | 3  | Uncertain  | Very low |
| Fibre                | <b>Gastrointestinal health</b>            |    |            |          |
|                      | Constipation                              | 17 | Favourable | Low      |
|                      | Ulcerative colitis                        | 1  | Uncertain  | Very low |
|                      | Crohn's disease                           | 1  | Uncertain  | Very low |
|                      | <b>Cardiovascular health</b>              |    |            |          |

|            |                                         |    |            |           |
|------------|-----------------------------------------|----|------------|-----------|
|            | Reduction in cholesterol                | 17 | Favourable | High      |
|            | Glycaemic control                       | 17 | Favourable | Low       |
|            | Obesity                                 | 15 | Favourable | Moderate  |
|            | Type 2 diabetes                         | 5  | Favourable | Moderate  |
|            | Cardiovascular disease mortality        | 3  | Favourable | Moderate  |
|            | Reduction in triglycerides              | 3  | Favourable | High      |
|            | Hypertension                            | 2  | Favourable | Moderate  |
|            | Coronary heart disease                  | 1  | Favourable | Moderate  |
|            | <b>Cancer</b>                           |    |            |           |
|            | Colorectal cancer                       | 12 | Favourable | Moderate  |
|            | <b>Other</b>                            |    |            |           |
|            | Anti-inflammatory                       | 2  | Favourable | Moderate  |
| Prebiotics | <b>Gastrointestinal health</b>          |    |            |           |
|            | Constipation <sup>b</sup>               | 11 | Favourable | Low       |
|            | Infectious diarrhoea                    | 6  | Favourable | Moderate  |
|            | Hepatic encephalopathy                  | 3  | Favourable | Moderate  |
|            | Non-alcohol-related fatty liver disease | 2  | Uncertain  | Very low  |
|            | Radiotherapy-induced diarrhoea          | 1  | Uncertain  | Uncertain |
|            | <b>Immune system health</b>             |    |            |           |
|            | Allergies                               | 1  | No effect  | Very low  |
|            | <b>Other</b>                            |    |            |           |
|            | Eczema                                  | 1  | No effect  | Uncertain |

\***Favourable effect** means the intervention is associated with a beneficial effect on the outcome of interest; **no effect** means the intervention makes little or no difference to the outcome of interest; **uncertain** means the certainty for an outcome was not reported, the results were contradictory, or effects could not be estimated.

#**High certainty** means the authors have a lot of confidence that the true effect is similar to the estimated effect; **moderate certainty** means the authors believe that the true effect is probably close to the estimated effect; **low certainty** means the true effect might be markedly different from the estimated effect; **very low certainty** means the true effect is probably markedly different from the estimated effect; and **uncertain** means certainty could not be estimated.

<sup>a</sup> Probiotics in the form of foods (fermented milks containing probiotic bacteria) and supplements were analysed together in the SRs consulted.

<sup>b</sup> Outcomes reported by probiotics combined with lactulose.

## Quality of information

After assessing the quality of the online information by applying the 10 criteria as described in the Methods section, we obtained a score of between 0 and 10 for all webpages. Figure 3 displays the median information quality score by intervention and webpage typology. The median quality score by intervention was 3, IQR [2, 4] and was not significantly different across all interventions. Scientific journal webpages had the highest quality score of all typologies, with a significantly higher median than commercial ( $p=0.009$ ), health portals ( $p=0.030$ ), news ( $p=0.026$ ) and professional webpages ( $p=0.026$ ).

[Figure 3]

Table 2 shows how quality criteria ranked among all interventions. While 39.5% of all webpages provided references or links to scientific publications, only a minority (18.4%, 21/114) adequately explained the key messages and conclusions of the paper's content.

Table 2. Webpages informing about probiotics, yoghurt, kefir, kombucha, fibre and prebiotics that meet each information quality criterion.

| Quality criteria                                              | All webpages (%)<br>n=114 | Probiotics (%)<br>n=19 | Yoghurt (%)<br>n=17 | Kefir (%)<br>n=20 | Kombucha (%)<br>n=20 | Fibre (%)<br>n=20 | Prebiotics (%)<br>n=18 |
|---------------------------------------------------------------|---------------------------|------------------------|---------------------|-------------------|----------------------|-------------------|------------------------|
| 1. Provides references or links to scientific publications    | 45 (39.5)                 | 11 (57.9)              | 5 (29.4)            | 6 (30.0)          | 5 (25.0)             | 9 (45.0)          | 9 (50.0)               |
| 2. Explains conclusions of scientific publications            | 21 (18.4)                 | 5 (26.3)               | 3 (17.7)            | 4 (20.0)          | 2 (10.0)             | 4 (20.0)          | 3 (16.7)               |
| 3. Quantifies relative effects                                | 9 (7.9)                   | 1 (5.3)                | 1 (5.9)             | 2 (10.0)          | 1 (5.0)              | 3 (15.0)          | 2 (11.1)               |
| 4. Quantifies absolute effects                                | 2 (1.8)                   | 0                      | 0                   | 0                 | 0                    | 1 (5.0)           | 1 (5.6)                |
| 5. Acknowledges some research limitations                     | 33 (28.9)                 | 8 (42.1)               | 6 (35.3)            | 3 (15.0)          | 3 (15.0)             | 6 (30.0)          | 7 (38.9)               |
| 6. Generally discusses certainty of evidence                  | 18 (15.8)                 | 5 (5.9)                | 1 (5.9)             | 1 (5.0)           | 4 (20.0)             | 3 (15.0)          | 4 (22.2)               |
| 7. Reports potential harms                                    | 48 (42.1)                 | 5 (26.3)               | 1 (5.9)             | 12 (60.0)         | 13 (65.0)            | 11 (55.0)         | 6 (33.3)               |
| 8. Reports on available alternatives                          | 49 (43.0)                 | 14 (73.7)              | 8 (47.1)            | 7 (35.0)          | 1 (5.0)              | 6 (30.0)          | 13 (72.2)              |
| 9. Discusses intervention costs                               | 4 (3.5)                   | 2 (10.5)               | 1 (5.9)             | 0                 | 1 (5.0)              | 0                 | 0                      |
| 10. Does not argue based on personal experiences or anecdotes | 113 (99.1)                | 18 (94.7)              | 17 (100.0)          | 20 (100.0)        | 18 (90.0)            | 20 (100.0)        | 20 (100.0)             |

Most webpages used verbal descriptions to explain intervention health benefits and did not quantify effects. Only 7.9% (9/114) of webpages quantified relative effects, including the five scientific journal webpages, of which only two included absolute effects.

Overall, only one third of webpages (28.9%, 33/114) stated some of the limitations of research findings. Mentions of limitations included, for example, acknowledging that research that supports health benefits is still in its early stages; stating that the food can improve a condition for a few people in limited circumstances but it cannot be extrapolated to other people due to the small sample studied; addressing conflicts of interest; and highlighting discrepancies between studies that mean the intervention may not be recommended for all indications. Only 15.8% of webpages (18/114) provided a general discussion of certainty of evidence supporting an intervention's benefits through consistent words and phrases that depended on whether the studies were observational (i.e., using cautionary phrases such as 'The results suggest' and conditional verb tenses) or experimental (i.e., using verbs that indicate causality such as 'lead to', 'reduce' or 'increase'). Other means of properly communicating certainty of evidence included stating that effects were currently under investigation or more research was needed to consider an intervention in the context of a specific condition. There were webpages, for example, that used a language of uncertainty, mentioning that, "The health benefits of the probiotics and prebiotics that are currently available have not been proven conclusively" or "For now, science does not know which of kefir's

1  
2  
3 components are responsible for its health benefits.” A further phrase mentioned how  
4 “There is not enough evidence that kombucha tea is as good for your health as some  
5 say.”  
6  
7

8 Only 42.1% of webpages mentioned or adequately discussed the potential harms of the  
9 intervention. Harms were reported in more than a half of webpages on kombucha  
10 (65.0%, 13/20), kefir (60.0%, 12/20) and fibre (55.0%, 11/20), but only in a quarter of  
11 webpages on probiotics (26.3%, 5/19). Similarly, less than half of webpages (43.0%,  
12 49/114) reported available alternatives to the main intervention (i.e., in the form of food  
13 or food supplements). The reporting of costs only appeared in 3.5% (4/114) of all  
14 webpages.  
15  
16

17  
18 Some commercial (19.3%, 22/114), health portals (9.6%, 11/114), news (7.0%, 8/114)  
19 and professional webpages (6.1%, 7/114) included a direct recommendation to  
20 consume the food or supplement. Webpages reporting on the potential harms also  
21 recommended not consuming the food or supplement under specific circumstances  
22 (e.g., avoiding probiotics and kombucha in immunocompromised adults). The  
23 recommendation of consulting a healthcare professional was included in a third of all  
24 webpages (28.1%, 32/114).  
25  
26

27 While for the criterion of acknowledging some research limitations the inter-rater  
28 agreement was 56% with Cohen’s kappa of 0.253 (95% CI: 0.095 to 0.411), for the  
29 remaining variables, the inter-rater agreement was higher than 70% with Cohen’s kappa  
30 of between 0.420 (95% CI: 0.234 to 0.605) and 0.929 (95% CI: 0.849 to 1.008),  
31 demonstrating ‘moderate’ to ‘almost perfect’ agreement (see dataset available from the  
32 FigShare repository for inter-rater agreement results).[49]  
33  
34  
35

## 36 **DISCUSSION**

37  
38 Our study shows that most online health claims for probiotics, yoghurt, kefir, kombucha,  
39 fibre and prebiotics are supported by low to very low certainty of evidence.  
40 Furthermore, the overall quality of information on the gut microbiome-related  
41 interventions studied was low, with a median quality score of 3 on a scale of 0 to 10 for  
42 all interventions when applying our 10 quality criteria.  
43  
44  
45

46 On webpage typology, results were not surprising. The prominent presence of  
47 commercial (23.7%) and news (23.7%) webpages in Spanish is in line with previous  
48 results on webpage content on probiotics in English.[33, 34] Our findings reflect  
49 companies’ interest in therapeutically exploiting the microbiome[33, 34] and the  
50 newsworthiness of the topic.[2-4]  
51  
52

53 Regarding the first objective, both the plethora of beneficial health claims for dietary  
54 interventions intended to improve health through the gut microbiome and the weak  
55 evidence base supporting such health claims were also expected. All in all, our data add  
56 valuable details for better understanding the online information to which audiences are  
57 exposed.  
58  
59  
60

1  
2  
3 First, our research finds that probiotics, fermented foods, fibre and prebiotics might be  
4 beneficial for 133 health indications. Similarly, Marcon *et al.* found that American and  
5 Canadian general newspapers mentioned up to 138 different health topics for which  
6 microbiome-related interventions were portrayed as beneficial.[4] However, very few  
7 of those purported benefits are supported by the evidence and integrated into clinical  
8 practice. Thus, while fibre has a long history of use in the clinical setting,[50] the degree  
9 to which probiotics are recommended to patients by healthcare professionals is  
10 variable.[29, 51] Factors explaining why some specialist doctors do not recommend  
11 probiotics include the perceived lack of research evidence and poor knowledge  
12 regarding use and cost.[52, 53] While uncertainty remains around the optimal use of  
13 probiotics,[36] the perception among patients who seek advice from  
14 gastroenterologists is that probiotics improve general health, longevity and  
15 gastrointestinal symptoms.[54]  
16  
17  
18  
19

20 Second, we found gastrointestinal health and immune system health-related indications  
21 are among the most widely mentioned benefits, which is in line with Neunez *et al.*'s  
22 findings for probiotics.[34] However, the concepts of 'boosting gut health' and 'boosting  
23 immunity', the latter of which spiked on the internet during the COVID-19 pandemic,[32]  
24 are misleading and scientifically inaccurate.[55, 56]  
25  
26  
27

28 Third, the evidence-based benefit of probiotics and yoghurt for preventing antibiotic-  
29 associated diarrhoea that appeared in most webpages is supported by moderate  
30 certainty of evidence,[57] while certainty of evidence is low and very low for irritable  
31 bowel syndrome[58] and infectious diarrhoea,[59] respectively, both of which appear in  
32 a high number of search results. Conversely, although there is moderate certainty of  
33 evidence of probiotics' role in preventing mortality and infections secondary to  
34 necrotising enterocolitis in very preterm infants or infants with a very low birth  
35 weight,[60] that health benefit only appeared in a few of the webpages that discussed  
36 probiotics (21.1%, 4/19). When interpreting SRs that perform a meta-analysis of  
37 probiotics, it should be acknowledged that said reviews do not usually report outcomes  
38 in appropriate probiotic strain-specific sub-groups. That may cloud any potential  
39 signalling of the probiotic for preventing or treating diseases and may contribute to  
40 explaining why only 54.7% of probiotic-related health claims are supported by evidence  
41 from SRs.[61] The low number of health claims for yoghurt (42.6%, 20/47) and kefir  
42 (1.8%, 1/55), supported by evidence from SRs, coincides with our previous findings using  
43 the GRADE approach, which showed that consuming probiotics in the form of fermented  
44 milks such as yoghurt and kefir may not be associated with any health benefits, with  
45 either low or very low certainty of evidence.[62] None of the health claims for kombucha  
46 was supported by evidence from SRs, which is expected due to the lack of controlled  
47 human studies investigating the potential health effects of this popular fermented  
48 drink.[30, 63]  
49  
50  
51  
52  
53

54 Fourth, not surprisingly given its common use among healthcare professionals in  
55 gastrointestinal disorders,[50] fibre was the intervention with the most health claims  
56 supported by high (reduction of cardiovascular disease risk factors)[64] to moderate  
57 (protection against colorectal cancer)[65] certainty of evidence. The efficacy of  
58 prebiotics for preventing constipation supported by low certainty of evidence[66]  
59  
60

1  
2  
3 appeared in a high proportion of webpages. In contrast, the more widely studied  
4 indication of prebiotics for managing hepatic encephalopathy, which showed moderate  
5 certainty of evidence,[67] appeared in very few webpages (16.7%, 3/18).  
6  
7

8 Regarding the second objective, the assessment of information quality carried out using  
9 our 10-criteria score shows interesting data on both overall quality and some specific  
10 shortcomings.  
11

12  
13 First, the low quality of online information assessed according to our 10 criteria is not  
14 surprising. However, it is even lower than estimated for news reports on health  
15 interventions in general, using other indices or scales containing common quality  
16 criteria. Thus, in our study, 92.1% of the webpages did not quantify the effects of the  
17 intervention, compared to 72% of the news items analysed by Schwitzer;<sup>[46]</sup> 84.2% did  
18 not discuss the certainty of the evidence, compared to 65%; and 96.5% did not report  
19 the costs of the intervention, compared to 77%. On two other common criteria, the  
20 results were more similar: 57% of the webpages did not report alternatives to the  
21 intervention, compared to 62% of the news items analysed by Schwitzer; and 57.9% did  
22 not report potential harms, compared to 67%.  
23  
24  
25

26 The first systematic review of the quality of information on health interventions in  
27 traditional media outlets and online resources also found room for improvement as  
28 regards health news.<sup>[45]</sup> However, nutrition-related information is especially prone to  
29 poor quality and may contribute to public misconceptions about dietary strategies  
30 targeting the gut microbiome and health.<sup>[68-72]</sup> One way to improve that situation  
31 might be to promote critical thinking among the public. In other words, it might be  
32 better to treat the effects of the current overabundance of information than to prevent  
33 it, since prevention is an almost impossible task, with exaggerated scientific findings and  
34 discoveries always attracting those who produce and recirculate information.<sup>[45, 73]</sup>  
35  
36  
37

38 Second, the strategy of including scientific references embedded in the text or as a list  
39 at the end of text (criterion 1) without explaining the conclusions of the scientific  
40 publications (criterion 2) is an example of how the 'health halo effect' around gut health  
41 and the microbiome is used to validate certain unproven alternative therapies.<sup>[4, 32]</sup> In  
42 addition, webpages also misrepresent the term 'probiotic', which is inadequately used  
43 to refer to kombucha and kefir and as an umbrella for all probiotic supplements, when,  
44 in actual fact, not all probiotics are backed by science and not all fermented foods can  
45 be considered probiotics.<sup>[30, 74]</sup> Likewise, many webpages use the term 'dysbiosis' as  
46 a reason to promote interventions with the connotation that an 'altered' microbiome in  
47 someone with a specific disease is causal or contributory, even though it is not always  
48 certain that changing the altered microbiome is beneficial<sup>[75]</sup> and the definition of a  
49 healthy microbiome is not known.<sup>[76]</sup>  
50  
51  
52  
53

54 Third, it is also worth noting that the majority of webpages only provide a qualitative  
55 description of the health claims without quantifying them (criteria 3 and 4). The few  
56 webpages that quantified the effects did so only in relative numbers (7.9%, 9/114),  
57 which tend to be more eloquent, are often misleading and can lead to a misguided  
58 perception of the reported effects.<sup>[75, 77]</sup> Only two out of five scientific journal  
59  
60



1  
2  
3 webpages included absolute effects. Indeed, the microbiome field relies too heavily on  
4 relative numbers of microorganisms.[75] For instance, one clear example of numerical  
5 misinterpretation is the long-assumed ratio, widely disseminated in the media and the  
6 scientific literature, that humans have 10 times more microbial cells than body cells.[78]  
7  
8

9 Fourth, the observation that only a few webpages acknowledged some research  
10 limitations (criterion 5) (28.9%, 33/114) and discussed certainty of evidence (criterion 6)  
11 (15.8%, 18/114) is common when informing on microbiome-related interventions. For  
12 instance, social media content rarely makes critical references to microbiome research  
13 findings and the only acknowledgments of limitations found are suggestions around the  
14 need for more research.[27] Likewise, previous findings show that only 19% of articles  
15 in English-language newspapers[4] and less than 10% of webpages portraying immune  
16 boosting strategies, including the use of probiotics and prebiotics,[32] report  
17 microbiome-related limitations (e.g., suggesting that the health benefits of and current  
18 research on the microbiome might be unproven, ineffective or exaggerated). Probiotics  
19 was the intervention with the highest proportion of webpages that provided limitations  
20 and comments around certainty of evidence, which might be explained by probiotics'  
21 status as the most widely studied subject when compared to fermented foods such as  
22 kefir and kombucha.[35, 36]  
23  
24  
25  
26  
27

28 Fifth, only a minority of webpages on probiotics informed of adverse effects (criterion  
29 7) and included advice against consumption by people with severe illnesses or  
30 compromised immune systems.[79] Previous analyses of online messages about  
31 probiotics also found that descriptions of their benefits outnumbered the descriptions  
32 of their risks, and the latter appeared significantly less on commercial webpages.[33, 34]  
33 That may be rooted in the lack of safety data in randomized controlled trials for  
34 probiotics.[80] Safety issues are also a concern for kombucha, with reports of varying  
35 degrees of adverse effects in relation to kombucha tea consumption,[81] while fibre and  
36 prebiotics are limited to mild issues such as abdominal discomfort, bloating and gas.[50]  
37  
38  
39

40 Our study shows two strengths. First, for the evaluation of online health claims, we  
41 relied on systematic reviews and assessments of the degree of certainty of evidence  
42 using the GRADE approach, which is a systematic, explicit and transparent  
43 methodological framework for grading certainty of evidence.[82, 83] Second, the  
44 authors have extensive knowledge of and experience in the fields of nutrition, evidence-  
45 based medicine, science journalism and microbiome research communication.  
46  
47

48 There are also several limitations to this study. First, we used single search phrases to  
49 perform the searches. That meant we could not explore differences in results for other  
50 search terms, which can vary in the current context of the COVID-19 pandemic. Second,  
51 the data set only includes Spanish-language webpages and focuses on the initial search  
52 results, although it must be acknowledged that the top 20 search results have a higher  
53 chance of being read.[39, 40] Third, we only focused on 10 parameters for assessing  
54 quality of information. Fourth, we did not analyse information published on social media  
55 channels, which provide relevant sources for people seeking nutrition advice online.  
56 Last, we analysed the certainty of the evidence behind online health claims based only  
57  
58  
59  
60

1  
2  
3 on systematic reviews, which are currently the evidence synthesis tool that offers the  
4 highest level of evidence.  
5

## 6 7 **CONCLUSION**

8  
9 Online information on probiotics, fermented foods, fibre and prebiotics does not reflect  
10 the available body of scientific evidence and is often incomplete and of a poor quality.  
11 The observation that the majority of health claims that appeared on the largest number  
12 of webpages were not necessarily the ones with the highest certainty of evidence may  
13 contribute to distorting the message about the impact of foods on health linked to their  
14 effects on the gut microbiome. Furthermore, the fact that research results and the  
15 quantification of the effects, limitations and uncertainty of evidence, along with the  
16 adverse effects, cost and alternatives of interventions, are not usually addressed can  
17 distort public perception of the topic.  
18  
19

## 20 21 **CONTRIBUTORS**

22  
23 APB and GC designed the research with input from MR and MB. APB, MR, MB and GC  
24 performed the research and analysed the data. APB and GC interpreted the data. APB  
25 wrote the manuscript. MR, MB and GC were involved in drafting and revising the  
26 manuscript. All authors approved the final version to be published and agreed to be  
27 accountable for all aspects of the work.  
28  
29

## 30 31 **COMPETING INTERESTS**

32  
33 APB works as a health writer for companies commercially involved in the gut microbiota  
34 and probiotics. MR, MB and GC have declared no competing interests.  
35  
36

## 37 38 **FUNDING**

39  
40 The authors have not declared a specific grant for this research from any funding agency  
41 in the public, commercial or not-for-profit sectors.  
42  
43

## 44 45 **DATA AVAILABILITY STATEMENT**

46  
47 All data relevant to the study are included in a public, open access repository. The data  
48 set is available:

49 [https://figshare.com/projects/Online\\_information\\_in\\_Spanish\\_on\\_probiotics\\_yoghurt\\_](https://figshare.com/projects/Online_information_in_Spanish_on_probiotics_yoghurt_kefir_kombucha_fibre_and_prebiotics/135935)  
50 [kefir kombucha fibre and prebiotics/135935](https://figshare.com/projects/Online_information_in_Spanish_on_probiotics_yoghurt_kefir_kombucha_fibre_and_prebiotics/135935)

## 51 52 **ETHICS APPROVAL**

53  
54 Patient consent for publication is not required.  
55  
56

## 57 58 **ORCID iD**

59 Andreu Prados-Bo <https://orcid.org/0000-0003-4393-9723>  
60

1  
2  
3  
4  
5  
6  
7  
8  
9  
10  
11  
12  
13  
14  
15  
16  
17  
18  
19  
20  
21  
22  
23  
24  
25  
26  
27  
28  
29  
30  
31  
32  
33  
34  
35  
36  
37  
38  
39  
40  
41  
42  
43  
44  
45  
46  
47  
48  
49  
50  
51  
52  
53  
54  
55  
56  
57  
58  
59  
60

Montserrat Rabassa <https://orcid.org/0000-0002-0276-6726>

Mireia Bosch <https://orcid.org/0000-0003-4795-2669>

Gonzalo Casino <https://orcid.org/0000-0003-1872-4130>

#### TWITTER:

@andreuprados, @MontseRabassa, @mboschpujadas, @gonzalocasino

#### REFERENCES

- 1 Shan Y, Segre JA, Chang EB. Responsible stewardship for communicating microbiome research to the press and public. *Nat Med* 2019;25(6):872–4 doi: 10.1038/s41591-019-0470-y [published Online First: 27 May 2019].
- 2 Prados-Bo A, Casino G. Microbiome research in general and business newspapers: how many microbiome articles are published and which study designs make the news the most? *PLOS ONE* 2021;16(4):e0249835 doi:10.1371/journal.pone.0249835
- 3 Prados-Bo A, Casino G. How have quality newspapers covered the microbiome? A content analysis of *The New York Times*, *The Times*, and *El País*. *Journalism* Published Online First: 21 January 2022. doi: 10.1177/14648849211067858
- 4 Marcon AR, Turvey S, Caulfield T. ‘Gut health’ and the microbiome in the popular press: a content analysis. *BMJ Open* 2021;11(7):e052446 doi:10.1136/bmjopen-2021-052446
- 5 O’Hara AM, Shanahan F. The gut flora as a forgotten organ. *EMBO Rep* 2006;7(7):688–93 doi: 10.1038/sj.embor.7400731 [published Online First: 1 July 2006].
- 6 Valdes AM, Walter J, Segal E, et al. Role of the gut microbiota in nutrition and health. *BMJ* 2018;361:j2179 doi:10.1136/bmj.j2179
- 7 Murray N, Al Khalaf S, Kaulmann D, et al. Compositional and functional alterations in the oral and gut microbiota in patients with psychosis or schizophrenia: a systematic review. *HRB Open Res* 2021;4:108 doi: 10.12688/hrbopenres.13416.1
- 8 Walter J, Armet AM, Finlay BB, et al. Establishing or exaggerating causality for the gut microbiome: lessons from human microbiota-associated rodents. *Cell* 2020;180(2):221–32 doi: 10.1016/j.cell.2019.12.025 [published Online First: 23 January 2020].
- 9 Vujkovic-Cvijin I, Sklar J, Jiang L, et al. Host variables confound gut microbiota studies of human disease. *Nature* 2020;587(7834):448–54 doi: 10.1038/s41586-020-2881-9 [published Online First: 4 November 2020].
- 10 Bar N, Korem T, Weissbrod O, et al. A reference map of potential determinants for the human serum metabolome. *Nature* 2020;588(7836):135–40 doi: 10.1038/s41586-020-2896-2 [published Online First: 11 November 2020].
- 11 Asnicar F, Berry SE, Valdes AM, et al. Microbiome connections with host metabolism and habitual diet from 1,098 deeply phenotyped individuals. *Nat Med* 2021;27(2):321–32 doi: 10.1038/s41591-020-01183-8 [published Online First: 11 January 2021].

- 1  
2  
3 12 Cotillard A, Cartier-Meheust A, Litwin NS, et al. A posteriori dietary patterns better  
4 explain variations of the gut microbiome than individual markers in the American Gut  
5 Project. *Am J Clin Nutr* 2022;115(2):432–43 doi: 10.1093/ajcn/nqab332 [published  
6 Online First: 7 October 2021].  
7  
8 13 Rothschild D, Weissbrod O, Barkan E, et al. Environment dominates over host  
9 genetics in shaping human gut microbiota. *Nature* 2018;555(7695):210–5  
10 doi:10.1038/nature25973 [published Online First: 28 February 2018].  
11  
12 14 National Science Board. Science & engineering indicators 2018. In: Science and  
13 technology: public attitudes and understanding. Alexandria, VA: National Science  
14 Foundation; 2018. pp. 7-1-7-92. Available:  
15 [https://www.nsf.gov/statistics/2018/nsb20181/report/sections/science-and-](https://www.nsf.gov/statistics/2018/nsb20181/report/sections/science-and-technology-public-attitudes-and-understanding/highlights)  
16 [technology-public-attitudes-and-understanding/highlights](https://www.nsf.gov/statistics/2018/nsb20181/report/sections/science-and-technology-public-attitudes-and-understanding/highlights) [Accessed 9 Feb 2022].  
17  
18 15 Departamento de Agricultura, Ganadería, Pesca y Alimentación y Observatorio de la  
19 Comunicación Científica. *La información alimentaria a debate. ¿Qué pide la sociedad?*,  
20 2021. Available:  
21 [https://www.upf.edu/documents/2725122/241382403/AyC\\_1\\_ES.pdf/11fc1e95-ca4e-](https://www.upf.edu/documents/2725122/241382403/AyC_1_ES.pdf/11fc1e95-ca4e-4797-8f0b-31d7b85cdc3f)  
22 [4797-8f0b-31d7b85cdc3f](https://www.upf.edu/documents/2725122/241382403/AyC_1_ES.pdf/11fc1e95-ca4e-4797-8f0b-31d7b85cdc3f) [Accessed 9 Feb 2022].  
23  
24 16 Chaffey D. Search engine marketing statistics 2022. Smart Insights, 2022. Available:  
25 <https://www.smartinsights.com/search-engine-marketing/search-engine-statistics/>  
26 [Accessed 9 Feb 2022].  
27  
28 17 The eBusiness. Top 15 best search Engines, 2021. Available:  
29 <http://www.ebizmba.com/articles/search-engines> [Accessed 9 Feb 2022].  
30  
31 18 Ramaswami P. A remedy for your health-related questions: Health info in the  
32 knowledge graph. Google official blog, 2015. Available:  
33 <https://blog.google/products/search/health-info-knowledge-graph/> [Accessed 9 Feb  
34 2022].  
35  
36 19 Helm J, Jones RM. Practice paper of the Academy of Nutrition and Dietetics: social  
37 media and the dietetics practitioner: opportunities, challenges, and best practices. *J*  
38 *Acad Nutr Diet* 2016;116(11):1825–35 doi: 10.1016/j.jand.2016.09.003 [published  
39 Online First: 24 October 2016].  
40  
41 20 Nagler RH. Adverse outcomes associated with media exposure to contradictory  
42 nutrition messages. *J Health Commun* 2014;19(1):24–40 doi:  
43 10.1080/10810730.2013.798384 [published Online First: 11 October 2013].  
44  
45 21 Williams G, Hamm MP, Shulhan J, et al. Social media interventions for diet and  
46 exercise behaviours: a systematic review and meta-analysis of randomised controlled  
47 trials. *BMJ Open* 2014;4:e003926 doi: 10.1136/bmjopen-2013-003926  
48  
49 22 Vijaykumar S, McNeill A, Simpson J. Associations between conflicting nutrition  
50 information, nutrition confusion and backlash among consumers in the UK. *Public*  
51 *Health Nutr* 2021;24(5):914–23 doi: 10.1017/S1368980021000124 [published Online  
52 First: 12 January 2021].  
53  
54 23 Marcon A. Microbiome research, nutrition, and social media: a messaging muddle.  
55 UNSCN nutrition 45: nutrition in a digital world, 2020. Available:  
56 <https://www.unscn.org/en/Unscn-news?idnews=2082> [Accessed 9 Feb 2022].  
57  
58 24 Hanage WP. Microbiology: microbiome science needs a healthy dose of scepticism.  
59 *Nature* 2014;512(7514):247–8 doi: 10.1038/512247a [published Online First: 20  
60 August 2014].

- 1  
2  
3 25 Neiderhuber M. The human microbiome and media confusion. *Science News*, 2015.  
4 Available: [https://sitn.hms.harvard.edu/flash/2015/the-human-microbiome-and-](https://sitn.hms.harvard.edu/flash/2015/the-human-microbiome-and-media-confusion/)  
5 [media-confusion/](https://sitn.hms.harvard.edu/flash/2015/the-human-microbiome-and-media-confusion/) [Accessed 9 Feb 2022].  
6  
7 26 Bik EM. The hoops, hopes, and hypes of human microbiome research. *Yale J Biol*  
8 *Med* 2016;89(3):363–73 [published Online First: 30 September 2016].  
9  
10 27 Hooks KB, Kongsman JP, O'Malley MA. Microbiota-gut-brain research: a critical  
11 analysis. *Behav Brain Sci* 2019;42:e60 doi: 10.1017/S0140525X18002133 [published  
12 Online First: 12 September 2018].  
13  
14 28 Eisen JA. Blog of Jonathan A. Eisen, Professor at U.C. Davis. Microbiomania. 2014.  
15 Available: <https://phylogenomics.blogspot.com/p/blog-page.html> [Accessed 9 Feb  
16 2022].  
17  
18 29 Dimidi E, Cox C, Scott SM, et al. Probiotic use is common in constipation, but only a  
19 minority of general and specialist doctors recommend them and consider there to be  
20 an evidence base. *Nutrition* 2019;61:157–63 doi: 10.1016/j.nut.2018.11.013 [published  
21 Online First: 23 November 2018].  
22  
23 30 Marco ML, Sanders ME, Gänzle M, et al. The International Scientific Association for  
24 Probiotics and Prebiotics (ISAPP) consensus statement on fermented foods. *Nat Rev*  
25 *Gastroenterol Hepatol* 2021;18(3):196–208 doi: 10.1038/s41575-020-00390-5  
26 [published Online First: 4 January 2021].  
27  
28 31 Mercer MB, Brinich MA, Geller G, et al. How patients view probiotics: findings from  
29 a multicenter study of patients with inflammatory bowel disease and irritable bowel  
30 syndrome. *J Clin Gastroenterol* 2012;46(2):138–44 doi:  
31 10.1097/MCG.0b013e318225f545 [published Online First: February 2012].  
32  
33 32 Rachul C, Marcon AR, Collins, et al. COVID-19 and 'immune boosting' on the  
34 internet: a content analysis of Google search results. *BMJ Open* 2020;10(10):e040989  
35 doi:10.1136/bmjopen-2020-040989  
36  
37 33 Brinich MA, Mercer MB, Sharp RR. An analysis of online messages about probiotics.  
38 *BMC Gastroenterol* 2013;13:5 doi:10.1186/1471-230X-13-5 [published Online First: 11  
39 January 2013].  
40  
41 34 Neunez M, Goldman M, Ghezzi P. Online information on probiotics: does it match  
42 scientific evidence? *Front Med (Lausanne)* 2020;6:296 doi:10.3389/fmed.2019.00296  
43  
44 35 World Gastroenterology Organisation. Probiotics and prebiotics. 2017. Available:  
45 <https://www.worldgastroenterology.org/guidelines/probiotics-and-prebiotics>  
46 [Accessed 9 Feb 2022].  
47  
48 36 Su GL, Ko CW, Bercik P, et al. AGA clinical practice guidelines on the role of  
49 probiotics in the management of gastrointestinal disorders. *Gastroenterology*  
50 2020;159(2):697–705 doi: 10.1053/j.gastro.2020.05.059 [published Online First: 1  
51 August 2020].  
52  
53 37 Google trends. Available: <https://trends.google.com/trends/> [Accessed 9 Feb 2022].  
54  
55 38 Answer the public. Available: <https://answerthepublic.com/> [Accessed 9 Feb 2022].  
56  
57 39 Eysenbach G, Köhler C. How do consumers search for and appraise health  
58 information on the world wide web? Qualitative study using focus groups, usability  
59 tests, and in-depth interviews. *BMJ* 2002;324:573 doi: 10.1136/bmj.324.7337.573  
60  
40 Petrescu P. Google organic click-through rates in 2014. MOZ, 2014. Available:  
41 <https://moz.com/blog/google-organic-click-through-rates-in-2014> [Accessed 10 Feb  
42 2022].

- 1  
2  
3 41 Cochrane Collaboration. Evidence-based health care and systematic reviews.  
4 Available: <https://www.cochrane.org/evidence> [Accessed 9 Feb 2022].
- 5 42 Atkins D, Best D, Briss PA, et al. Grading quality of evidence and strength of  
6 recommendations. *BMJ* 2004;328:1490 doi: 10.1136/bmj.328.7454.1490
- 7 43 Cochrane Norway. How to write a plain language summary of a Cochrane  
8 intervention review. 2019. Available:  
9 [https://www.cochrane.no/sites/cochrane.no/files/uploads/how\\_to\\_write\\_a\\_cochrane  
10 pls\\_12th\\_february\\_2019.pdf](https://www.cochrane.no/sites/cochrane.no/files/uploads/how_to_write_a_cochrane_pls_12th_february_2019.pdf) [Accessed 10 Feb 2022].
- 11 44 Rabassa M, Alonso-Coello P, Casino G. Nutrimedia: A novel web-based resource for  
12 the general public that evaluates the veracity of nutrition claims using the GRADE  
13 approach. *PLOS ONE* 2020;15(4):e0232393 doi: 10.1371/journal.pone.0232393
- 14 45 Oxman M, Larun L, Pérez Gaxiola G, et al. Quality of information in news media  
15 reports about the effects of health interventions: Systematic review and meta-  
16 analyses. *F1000Res* 2021;10:433 doi: 10.12688/f1000research.52894.2
- 17 46 Schwitzer G. How do US journalists cover treatments, tests, products, and  
18 procedures? An evaluation of 500 stories. *PLoS Med* 2008;5(5):e95 doi:  
19 10.1371/journal.pmed.0050095
- 20 47 Bosch F, Escalas C, Forteza A, et al. A checklist for improving drug information in the  
21 general press: the importance of reporting on the phases and uncertainty of research.  
22 *Revista Española de Comunicación en Salud* 2018;9(2):203–14 doi:  
23 10.20318/recs.2018.4498
- 24 48 Santesso N, Glenton C, Dahm P, et al. GRADE guidelines 26: informative statements  
25 to communicate the findings of systematic reviews of interventions. *J Clin Epidemiol*  
26 2020;119:126–35 doi: 10.1016/j.jclinepi.2019.10.014 [published Online First: 8  
27 November 2019].
- 28 49 Landis JR, Koch GG. The measurement of observer agreement for categorical data.  
29 *Biometrics* 1977;33(1):159–74 doi: 10.2307/2529310
- 30 50 Gill SK, Rossi M, Bajka B, et al. Dietary fibre in gastrointestinal health and disease.  
31 *Nat Rev Gastroenterol Hepatol* 2021;18(2):101–16 doi: 10.1038/s41575-020-00375-4  
32 [published Online First: 18 November 2020].
- 33 51 Fijan S, Frauwallner A, Varga L, et al. Health professionals' knowledge of probiotics:  
34 an international survey. *Int J Environ Res Public Health* 2019;16(17):3128 doi:  
35 10.3390/ijerph16173128
- 36 52 Subhan Arshad M, Saqlain M, Majeed A, et al. Cross-sectional study to assess the  
37 healthcare professionals' knowledge, attitude and practices about probiotics use in  
38 Pakistan. *BMJ Open* 2021;11:e047494 doi: 10.1136/bmjopen-2020-047494
- 39 53 Dimidi E, Scott SM, Whelan K. Probiotics and constipation: mechanisms of action,  
40 evidence for effectiveness and utilisation by patients and healthcare professionals.  
41 *Proc Nutr Soc* 2020;79(1):147–57 doi: 10.1017/S0029665119000934 [published Online  
42 First: 2 July 2019].
- 43 54 Lynch E, Troob J, Lebowhl B, et al. Who uses probiotics and why? A survey study  
44 conducted among general gastroenterology patients. *BMJ Open Gastro*  
45 2021;8:e000742 doi: 10.1136/bmjgast-2021-000742
- 46 55 Staudacher HM, Loughman A. Gut health: definitions and determinants. *Lancet*  
47 *Gastroenterol Hepatol* 2021;6(4):269 doi: 10.1016/S2468-1253(21)00071-6 [published  
48 Online First: 1 April 2021].
- 49  
50  
51  
52  
53  
54  
55  
56  
57  
58  
59  
60

- 1  
2  
3 56 Cassa Macedo A, Vilela de Faria AO, Ghezzi P. Boosting the immune system, from  
4 science to myth: analysis the infosphere with Google. *Front Med (Lausanne)*  
5 2019;6:165 doi: 10.103389/fmed.2019.00165  
6  
7 57 Guo Q, Goldenberg JZ, Humphrey C, et al. Probiotics for the prevention of pediatric  
8 antibiotic-associated diarrhea. *Cochrane Database Syst Rev*. 2019;4:CD004827 doi:  
9 10.1002/14651858.CD004827.pub5  
10  
11 58 Connell M, Shin A, James-Stevenson T, et al. Systematic review and meta-analysis:  
12 efficacy of patented probiotic, VSL#3, in irritable bowel syndrome. *Neurogastroenterol*  
13 *Motil* 2018;30(12):e13427 doi: 10.1111/nmo.13427  
14  
15 59 Collinson S, Deans A, Padua-Zamora A, et al. Probiotics for treating acute infectious  
16 diarrhoea. *Cochrane Database Syst Rev* 2020;12(12):CD003048 doi:  
17 10.1002/14651858.CD003048.pub4  
18  
19 60 Sharif S, Meader N, Oddie SJ, et al. Probiotics to prevent necrotising enterocolitis in  
20 very preterm or very low weight infants. *Cochrane Database Syst Rev*  
21 2020;10:CD005496 doi: 10.1002/14651858.CD005496  
22  
23 61 McFarland LV, Evans CT, Goldstein EJC. Strain-specificity and disease-specificity of  
24 probiotic efficacy: a systematic review and meta-analysis. *Front Med (Lausanne)*  
25 2018;5:124 doi: 10.3389/fmed.2018.00124  
26  
27 62 Nutrimedia. Mensajes evaluados. ¿Son los alimentos probióticos beneficiosos para  
28 la salud? 2021. Available: [https://www.upf.edu/web/nutrimedia/-/-son-los-alimentos-  
29 probioticos-beneficiosos-para-la-salud-#.Yc39JRPmJm9](https://www.upf.edu/web/nutrimedia/-/-son-los-alimentos-probioticos-beneficiosos-para-la-salud-#.Yc39JRPmJm9) [Accessed 10 Feb 2022].  
30  
31 63 Kapp JM, Sumner W. Kombucha: a systematic review of the empirical evidence of  
32 human health benefit. *Ann Epidemiol* 2019;30:66–70 doi:  
33 10.1016/j.annepidem.2018.11.001 [published Online First: 10 November 2018].  
34  
35 64 Chiavaroli L, Nishi SK, Khan TA, et al. Portfolio dietary pattern and cardiovascular  
36 disease: a systematic review and meta-analysis of controlled trials. *Prog Cardiovasc Dis*  
37 2018;61(1):43–53 doi: 10.1016/j.pcad.2018.05.004 [published Online First: 26 May  
38 2018].  
39  
40 65 Reynolds A, Mann J, Cummings J, et al. Carbohydrate quality and human health: a  
41 series of systematic reviews and meta-analyses. *Lancet* 2019;393(10170):434–45 doi:  
42 10.1016/S0140-6736(18)31809-9 [published Online First: 2 February 2019].  
43  
44 66 Shi Q, Tan L, Liu C, et al. Comparative efficacy of pharmacological and  
45 nonpharmacological treatments for chronic idiopathic constipation in China: a  
46 Bayesian network meta-analysis. *BMC Complement Altern Med* 2019;19(1):311 doi:  
47 10.1186/s12906-019-2741-z [published Online First: 14 November 2019].  
48  
49 67 Gluud LL, Vilstrup H, Morgan MY. Non-absorbable disaccharides versus placebo/no  
50 intervention and lactulose versus lactitol for the prevention and treatment of hepatic  
51 encephalopathy in people with cirrhosis. *Cochrane Database Syst Rev*  
52 2016;5:CD003044 doi: 10.1002/14651858.CD003044.pub4  
53  
54 68 Ostry A, Young ML, Hughes M. The quality of nutritional information available on  
55 popular websites: a content analysis. *Health Educ Res* 2008;23(4):648–55  
56 doi:10.1093/her/cym050 [published Online First: 25 September 2007].  
57  
58 69 Cooper BEJ, Lee WE, Goldacre BM, et al. The quality of the evidence for dietary  
59 advice given in UK national newspapers. *Public Underst Sci* 2012;21(6):664–73 doi:  
60 10.1177/0963662511401782 [published Online First: 11 April 2011].  
70  
71 70 Gholizadeh Z, Papi A, Ashrafi-rizi H, et al. Quality evaluation of Persian nutrition and  
72 diet therapy websites. *J Educ Health Promot* 2017;6:48 doi: 10.4103/jehp.jehp\_83\_14

- 1  
2  
3 71 Kininmonth AR, Jamil N, Almatrouk N, et al. Quality assessment of nutrition  
4 coverage in the media: a 6-week survey of five popular UK newspapers. *BMJ Open*  
5 2017;7:e014633 doi: 10.1136/bmjopen-2016-014633  
6  
7 72 El Jassar OG, El Jassar IN, Kritsotakis EI. Assessment of quality of information  
8 available over the internet about vegan diet. *Nutrition & Food Science*  
9 2019;49(6):1142–52 doi: 10.1108/NFS-02-2019-0044 [published Online First: 11  
10 November 2019].  
11  
12 73 Schwartz LM, Steven W. On the prevention and treatment of exaggeration. *J Gen*  
13 *Intern Med* 2003;18(2):153–4 doi: 10.1046/j.1525-1497.2003.21216.x  
14  
15 74 Reid G, Gadir AA, Dhir R. Probiotics: Reiterating what they are and what they are  
16 not. *Front Microbiol* 2019;10:424 doi: 10.3389/fmicb.2019.00424  
17  
18 75 Shanahan F, Hill C. Language, numeracy and logic in microbiome science. *Nat Rev*  
19 *Gastroenterol Hepatol* 2019;16(7):387–8 doi: 10.1038/s41575-019-0163-5 [published  
20 Online First: 5 June 2019].  
21  
22 76 Shanahan F, Ghosh TS, O’Toole PW. The healthy microbiome-What is the definition  
23 of a healthy gut microbiome? *Gastroenterology* 2021;160(2):483–94 doi:  
24 10.1053/j.gastro.2020.09.057  
25  
26 77 Casino G. Producers, communicators and consumers of ‘risk’. *J Epidemiol*  
27 *Community Health* 2010;64(11):940 doi: 10.1136/jech.2008.084517 [published Online  
28 First: 30 August 2010].  
29  
30 78 Sender R, Fuchs S, Milo R. Revised estimates for the number of human and bacteria  
31 cells in the body. *PLoS Biol* 2016;14(8):e1002533 doi: 10.1371/journal.pbio.1002533  
32  
33 79 Hill C. Balancing the risks and rewards of live biotherapeutics. *Nat Rev Gastroenterol*  
34 *Hepatol* 2020;17(3):133–4 doi: 10.1038/s41575-019-0254-3 [published Online First: 23  
35 December 2019].  
36  
37 80 Bafeta A, Koh M, Riveros C, et al. Harms reporting in randomized controlled trials of  
38 interventions aimed at modifying microbiota: a systematic reviews. *Ann Intern Med*  
39 2018;169(4):240–7 doi: 10.7326/M18-0343 [published Online First: 17 July 2018].  
40  
41 81 Ferreira de Miranda J, Fernandes Ruiz L, Borges Silva C, et al. Kombucha: a review of  
42 substrates, regulations, composition, and biological properties. *J Food Sci* 2022;  
43 87(2):503–27 doi: 10.1111/1750-3841.16029 [published Online First: 14 January 2022].  
44  
45 82 Alonso-Coello P, Schunemann HJ, Moberg J, et al. [GRADE Evidence to Decision  
46 (EtD) frameworks: a systematic and transparent approach to making well informed  
47 healthcare choices. 1: Introduction]. *Gac Sanit* 2018;32(2):166.e1–e10 doi:  
48 10.1016/j.gaceta.2017.02.010 [published Online First: 17 August 2017].  
49  
50 83 Alonso-Coello P, Rigau D, Sanabria AJ, et al. Quality and strength: the GRADE system  
51 for formulating recommendations in clinical practice guidelines. *Arch Bronconeumol*  
52 2013;49(6):261–7 doi: 10.1016/j.arbres.2012.12.001 [published Online First: 1 May  
53 2013].  
54  
55  
56  
57  
58  
59  
60



---

Legends of the figures cited within the main text:

Figure 1. Online health claim topics portrayed for probiotics, yoghurt, kefir, kombucha, fibre and prebiotics.

Figure 2. Number of online health claims for probiotics, yoghurt, kefir, kombucha, fibre and prebiotics supported or not by evidence from systematic reviews (SRs).

Figure 3. Information quality score by intervention (A) and webpage typology (B). Data are reported as median and interquartile range. C, commercial; HP, health portal; N, news; NP, non-profit organisation; P, professional; SJ, scientific journal; G, governmental; O, other. \* $p < 0.05$  vs scientific journals according to a Kruskal-Wallis test.

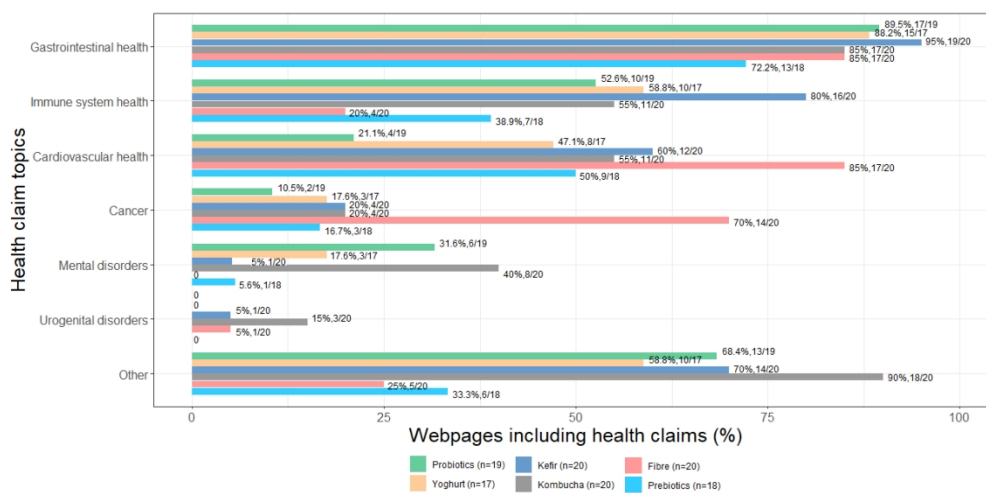

Figure 1. Online health claim topics portrayed for probiotics, yoghurt, kefir, kombucha, fibre and prebiotics.

109x56mm (300 x 300 DPI)

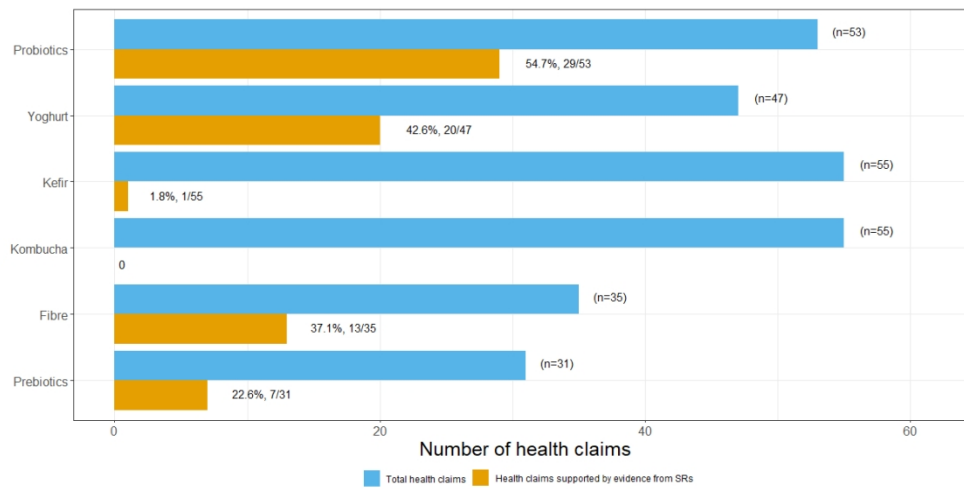

Figure 2. Number of online health claims for probiotics, yoghurt, kefir, kombucha, fibre and prebiotics supported or not by evidence from systematic reviews (SRs).

109x56mm (300 x 300 DPI)

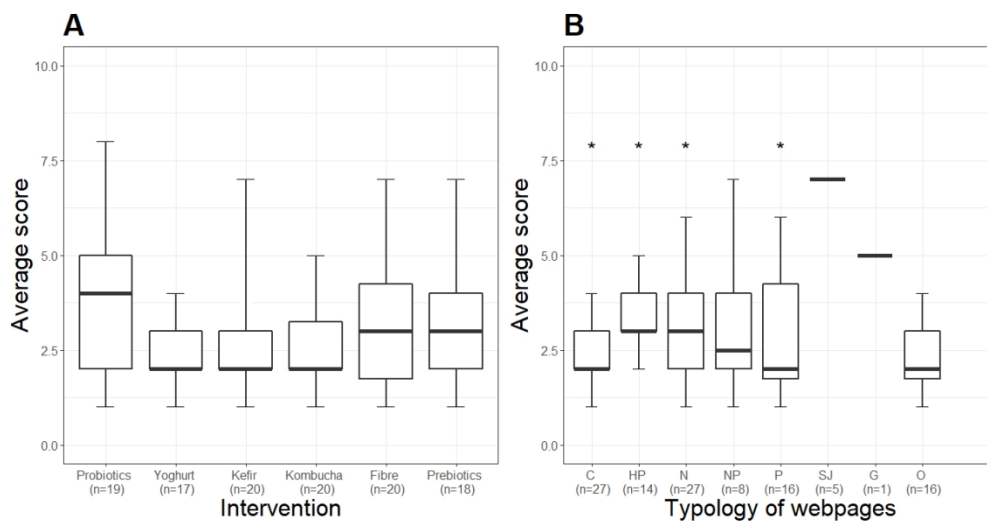

Figure 3. Information quality score by intervention (A) and webpage typology (B). Data are reported as median and interquartile range. C, commercial; HP, health portal; N, news; NP, non-profit organisation; P, professional; SJ, scientific journal; G, governmental; O, other. \*p<0.05 vs scientific journals according to a Kruskal-Wallis test.

109x56mm (300 x 300 DPI)

# BMJ Open

## Online information in Spanish on probiotics, yoghurt, kefir, kombucha, fibre and prebiotics: an analysis of the quality of information and the certainty of the evidence supporting health claims

|                                 |                                                                                                                                                                                                                                                                                                                                                                                                                                                                                                        |
|---------------------------------|--------------------------------------------------------------------------------------------------------------------------------------------------------------------------------------------------------------------------------------------------------------------------------------------------------------------------------------------------------------------------------------------------------------------------------------------------------------------------------------------------------|
| Journal:                        | <i>BMJ Open</i>                                                                                                                                                                                                                                                                                                                                                                                                                                                                                        |
| Manuscript ID                   | bmjopen-2022-063316.R1                                                                                                                                                                                                                                                                                                                                                                                                                                                                                 |
| Article Type:                   | Original research                                                                                                                                                                                                                                                                                                                                                                                                                                                                                      |
| Date Submitted by the Author:   | 11-Jul-2022                                                                                                                                                                                                                                                                                                                                                                                                                                                                                            |
| Complete List of Authors:       | Prados-Bo, Andreu; Pompeu Fabra University, Department of Communication; Ramon Llull University, Blanquerna School of Health Science<br>Rabassa , Montserrat; Eurecat Centre Tecnològic de Catalunya, Unitat de Nutrició i Salut<br>Bosch, Mireia; Eurecat Centre Tecnològic de Catalunya, Unitat de Nutrició i Salut<br>Casino, Gonzalo; Pompeu Fabra University, Department of Communication; Iberoamerican Cochrane Centre, Biomedical Research Institute Sant Pau (IIB Sant Pau), Barcelona, Spain |
| <b>Primary Subject Heading</b>: | Communication                                                                                                                                                                                                                                                                                                                                                                                                                                                                                          |
| Secondary Subject Heading:      | Gastroenterology and hepatology, Nutrition and metabolism, Public health                                                                                                                                                                                                                                                                                                                                                                                                                               |
| Keywords:                       | NUTRITION & DIETETICS, PUBLIC HEALTH, GASTROENTEROLOGY                                                                                                                                                                                                                                                                                                                                                                                                                                                 |
|                                 |                                                                                                                                                                                                                                                                                                                                                                                                                                                                                                        |

SCHOLARONE™  
Manuscripts

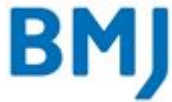

I, the Submitting Author has the right to grant and does grant on behalf of all authors of the Work (as defined in the below author licence), an exclusive licence and/or a non-exclusive licence for contributions from authors who are: i) UK Crown employees; ii) where BMJ has agreed a CC-BY licence shall apply, and/or iii) in accordance with the terms applicable for US Federal Government officers or employees acting as part of their official duties; on a worldwide, perpetual, irrevocable, royalty-free basis to BMJ Publishing Group Ltd ("BMJ") its licensees and where the relevant Journal is co-owned by BMJ to the co-owners of the Journal, to publish the Work in this journal and any other BMJ products and to exploit all rights, as set out in our [licence](#).

The Submitting Author accepts and understands that any supply made under these terms is made by BMJ to the Submitting Author unless you are acting as an employee on behalf of your employer or a postgraduate student of an affiliated institution which is paying any applicable article publishing charge ("APC") for Open Access articles. Where the Submitting Author wishes to make the Work available on an Open Access basis (and intends to pay the relevant APC), the terms of reuse of such Open Access shall be governed by a Creative Commons licence – details of these licences and which [Creative Commons](#) licence will apply to this Work are set out in our licence referred to above.

Other than as permitted in any relevant BMJ Author's Self Archiving Policies, I confirm this Work has not been accepted for publication elsewhere, is not being considered for publication elsewhere and does not duplicate material already published. I confirm all authors consent to publication of this Work and authorise the granting of this licence.

## Title page

Online information in Spanish on probiotics, yoghurt, kefir, kombucha, fibre and prebiotics: an analysis of the quality of information and the certainty of the evidence supporting health claims

**First author:** Andreu Prados-Bo[1, 2]

1 Department of Communication, Pompeu Fabra University, Barcelona, Spain.

2 Blanquerna School of Health Science, Ramon Llull University, Barcelona, Spain.

<https://orcid.org/0000-0003-4393-9723>

**Second author:** Montserrat Rabassa[3]

3 Eurecat, Centre Tecnològic de Catalunya, Unitat de Nutrició i Salut, 43204 Reus, Spain.

<https://orcid.org/0000-0002-0276-6726>

**Third author:** Mireia Bosch[3]

3 Eurecat, Centre Tecnològic de Catalunya, Unitat de Nutrició i Salut, 43204 Reus, Spain.

<https://orcid.org/0000-0003-4795-2669>

**Fourth author:** Gonzalo Casino[1, 4]

1 Department of Communication, Pompeu Fabra University, Barcelona, Spain.

4 Iberoamerican Cochrane Centre, Biomedical Research Institute Sant Pau (IIB Sant Pau), Barcelona, Spain.

<https://orcid.org/0000-0003-1872-4130>

### Corresponding authors:

Andreu Prados-Bo

Email: [andreu@andreuprados.com](mailto:andreu@andreuprados.com)

Address: Department of Communication (Scientific Communication Research Group – Observatory of Scientific Communication), Universitat Pompeu Fabra, Roc Boronat 138, 08018 Barcelona, Spain.

Gonzalo Casino

Email: [gonzalo.casino@upf.edu](mailto:gonzalo.casino@upf.edu)

Address: Department of Communication (Scientific Communication Research Group – Observatory of Scientific Communication), Universitat Pompeu Fabra, Roc Boronat 138, 08018 Barcelona, Spain.

**Word count** (excluding the title page, abstract, tables, figures, acknowledgments, contributions and references): **5,650**

## ABSTRACT

### Objective

To examine the certainty of the evidence supporting health claims about probiotics, yoghurt, kefir, kombucha, fibre and prebiotics, and to assess the quality of online information in Spanish.

### Design

Content analysis.

### Methods

We compiled a dataset of 114 webpages returned by searching six popular search phrases in Spanish relating to probiotics, yoghurt, kefir, kombucha, fibre and prebiotics on Google.es and coded them for typology and health claims. We examined the certainty of the evidence for health claims from systematic reviews. Information quality was assessed according to 10 criteria, where a webpage: mentions scientific publications and reports their conclusions; quantifies relative and absolute effects; acknowledges some limitations; discusses certainty of evidence; reports the potential harms, alternatives and costs of the intervention; and does not argue based on personal experiences.

### Results

Gastrointestinal health (86.0%), vague claims relating to maintaining health (57.9%), cardiovascular health (53.5%) and immune system health (50.9%) were the most widely mentioned topics. Half of health claims (52.6%, 70/133) were supported by evidence from systematic reviews. Probiotics had the highest number of health claims supported by evidence and kombucha the lowest. The highest certainty was found for antibiotic-associated diarrhoea (moderate) in probiotics and yoghurt, infectious diarrhoea and hepatic encephalopathy (moderate) in prebiotics, and cardiovascular health (high to moderate) and colorectal cancer (moderate) in fibre. On a scale of 0 to 10, the median information quality score for all webpages was 3. Only 18.4% of webpages reported study conclusions, 7.9% quantified the effects, 28.9% acknowledged some limitations in the research and 42.1% reported potential harms.

### Conclusions

Most online health claims for dietary interventions intended for improving health through the gut microbiome are supported by low or very low certainty of evidence. Online information does not align with the evidence and is incomplete or unbalanced.

Keywords: diet, probiotics, fermented foods, fibre, prebiotics, health claims, online health information, quality of information, certainty of evidence.



## STRENGTHS AND LIMITATIONS OF THIS STUDY

- This study examines the extent to which online health claims for popular dietary interventions related to the gut microbiome are aligned with certainty of evidence evaluated using the GRADE approach.
- We propose 10 criteria (scored from 0 to 10) for assessing information quality, selected on the basis of the first systematic review of the quality of news reports on the effects of health interventions.
- The content analysis only focuses on some popular searches and the top 20 search results on Google.
- The study is limited in scope, since it only focuses on Spanish-language webpages and does not analyse information available on social media channels.

## INTRODUCTION

Research into the microbial ecosystem residing in the gastrointestinal tract, which is collectively known as the gut microbiome, is commanding increasing attention among medical audiences and the general public.[1-4] While the microbiome is now often thought of as a virtual organ of the body due to its influence in many areas of human health, from immunity to energy metabolism and mental health,[5-7] its causal involvement in diseases is mostly unresolved.[8] Recent large-scale studies have shown that diet is among the most important environmental factors to which the gut microbiome is exposed and by which it is modified on a daily basis, even outweighing host genetics.[9-13]

Probiotics, fermented foods, fibre and prebiotics are dietary interventions that influence human health in terms of their effect on the gut microbiome. The health benefits of probiotics include their effect on digestive ailments (i.e., treating acute diarrhoea and antibiotic-associated diarrhoea, managing symptoms of lactose intolerance, treating pouchitis, preventing *Clostridioides difficile* infection and preventing necrotising enterocolitis in preterm infants). They also provide benefits in relation to non-alcoholic fatty liver diseases and some immune-related conditions (i.e., preventing or treating infectious diseases and preventing atopic dermatitis).[14, 15] Fermented foods have also undergone a surge in popularity, although not all have a proven impact on clinical health outcomes. The most widely investigated fermented foods are yoghurt, with evidence for managing symptoms of lactose intolerance and reducing the risk of metabolic syndrome, and kefir, with beneficial effects in both lactose malabsorption and *H. pylori* eradication.[16] Fibre can aid with gut disorders (i.e., irritable bowel syndrome, inflammatory bowel diseases, diverticular disease and functional constipation), reducing the risk of cardiovascular diseases and lowering all-cause mortality rate.[17-19] Prebiotics have been studied for reducing constipation and diarrhoea, promoting metabolic health, modulating satiety, helping with symptoms of irritable bowel syndrome, treating hepatic encephalopathy and reducing risk of allergy.[14, 20]

Contemporary audiences are increasingly turning to the internet as a source of information about health and nutrition.[21, 22] Google is the most widely used search engine[23, 24] and one in 20 Google searches seek health-related information.[25] The

1  
2  
3 health and nutrition-related information disseminated by online resources may  
4 influence health perception and food practices,[26-29] and the online space in particular  
5 has fuelled the promotion of microbiome-related interventions for maintaining health  
6 and quality of life.[30] However, information on the microbiome in online resources or  
7 websites (e.g., newspapers and Google searches) is often misleading, does not always  
8 report limitations and tends to simplify or exaggerate the benefits of microbiome-based  
9 interventions.[1, 4, 31-34] That has led to the microbiome being oversold as the main  
10 cause of all health and illness, in a phenomenon dubbed 'microbiomania'.[35] Despite  
11 the huge amount of health-related information that can be accessed online, there is no  
12 universal tool available for evaluating the quality of information on the effects of health  
13 interventions. Furthermore, the authors have not found any studies that explore the  
14 quality of online information on microbiome-related interventions.  
15  
16  
17  
18

19 The gut microbiome-related food and dietary supplement industry is largely  
20 unregulated in the United States and Europe and marketing of such products is often  
21 geared directly at consumers without consistent evidence of efficacy and safety.[36, 37]  
22 On the one hand, regulatory authorities do not allow health claims to be made for  
23 probiotics and prebiotics, but on the other, there is little regulation of the manufacturing  
24 process and marketing actions,[38] which can contribute to the spread of misleading  
25 information on these products.  
26  
27  
28

29 As for health and nutrition in general, the internet is a major source of information  
30 among the general population about probiotic and fermented food use for the benefit  
31 of gut health.[16, 39, 40] During the COVID-19 pandemic, news and commercial  
32 websites frequently mentioned the microbiome and gut health in relation to immune  
33 boosting strategies, which, nevertheless, were lacking in evidence.[41] Two previous  
34 content analyses of webpages on probiotics in English showed poor quality and  
35 objective information, with commercial websites providing the lowest score.[42, 43]  
36 Whether those findings can extrapolate to online information for other dietary  
37 strategies such as fermented foods, fibre and prebiotics, widely promoted as influencing  
38 human health through their effect on the gut microbiome, is unknown.  
39  
40  
41

42 This study addresses both the scientific basis and the quality of the online information  
43 on gut microbiome-related interventions to which the public is exposed. Our first  
44 objective was to examine the certainty of the evidence from systematic reviews (SRs)  
45 that support health claims regarding probiotics, yoghurt, kefir, kombucha, fibre and  
46 prebiotics in the top 20 indexed webpages in Spanish. We focused on such interventions  
47 for two reasons. First, most of the elements under focus (i.e., probiotics, yoghurt, kefir,  
48 fibre and prebiotics) have been studied in at least one human interventional study.[6,  
49 14-16] Second, it was observed through an analysis on Google Trends[44] that those  
50 topics had been increasingly subject to consumer interest from 2010 onwards, while  
51 becoming relatively stable between 2019 and 2021. Our second objective was to  
52 develop an overall score based on 10 criteria for evaluating the quality of information,  
53 according to intervention and webpage typology.  
54  
55  
56  
57

## 58 **METHODS**

59  
60

## Google searches and selection criteria

In line with Neunez *et al.*,<sup>[43]</sup> we conducted searches on <https://google.es> using the Google Chrome browser and employing phrases based on search-term popularity as provided by AnswerThePublic.<sup>[45]</sup> The chosen phrases were: ‘por que tomar probióticos’, ‘qué yogur tiene más probióticos’, ‘por que tomar kefir’, ‘por que tomar kombucha’, ‘fibra beneficios’ and ‘que son prebióticos y para que sirven’. The searches took place in August 2021 in Tarragona, Spain. We decided to choose phrases containing words without accents because, according to Google Trends,<sup>[44]</sup> that is the most common way in which users search. Consequently, the results returned are what most users would find (for the relative popularity of the search terms used, see reference <sup>[46]</sup>). Before searching, we logged out from any Google accounts and cleared caches and browsing histories to limit any personalization of the search results.

Since consumers’ online information searches are typically limited to initial search results,<sup>[47, 48]</sup> we limited our sample to the first 20 uniform resource locators (URLs) returned when searching for the aforementioned six search phrases. As there were six interventions in total, the initial dataset consisted of 120 webpages. Based on previous studies on information about health interventions,<sup>[41, 43, 49-51]</sup> all webpages written in Spanish, which were freely accessible (i.e., they did not have paywalls and/or login requirements) and which provided information on each intervention of interest were considered eligible. The following webpages were excluded: any irrelevant webpages (i.e., the main focus was not the searched-for intervention), webpages only featuring video content, retail sites intended for direct purchase, and advertisements. After excluding six webpages (three irrelevant webpages, one webpage offering only video information and two online shops), a total of 114 webpages were classed as being eligible for analysis.

## Webpage typology

We coded the content of the webpage linked to the URL, but not the content provided in the hyperlinks to other webpages. One author (APB) downloaded the webpage texts as individual PDF files, deleting any reference to source or authors, and coded the webpages according to Neunez *et al.*’s typology: commercial (C), news (N), health portal (HP), professional (P), governmental (G), non-profit organisation (NP), scientific journal (SJ) and other (O).<sup>[43]</sup> For examples of the classification, see reference <sup>[52]</sup>.

## Health claims and the certainty of the evidence that supports them

Two authors (MB and GC) coded the health claims relating to each intervention (gastrointestinal health, immune system health, cardiovascular health, cancer, mental disorders, urogenital disorders and other). ‘Other’ was categorised when the webpage stated the intervention was valuable for general health (i.e., using general phrasing such as “helps maintain health or quality of life”, “manages stress”, “improves sleep”, etc.), skin health (including cosmetic and skin disorders such as eczema and psoriasis) and respiratory disorders. APB coded specific indications within each health claim topic mentioned in the webpages. We also noted when an article on a webpage made a clear

1  
2  
3 recommendation to consume or avoid the food or supplement and included the advice  
4 to consult a healthcare professional.  
5

6  
7 To identify which health claims were supported by evidence from SRs, we conducted a  
8 search of SRs for each intervention in PubMed and the Cochrane Database of Systematic  
9 Reviews in December 2021. We did not restrict the search to specific health claims and  
10 it was performed after the online health claims were identified. The two authors who  
11 identified the SRs (APB and MR) were not involved in coding the health claims made on  
12 the webpages. SRs were chosen since they gather and analyse all studies that answer  
13 the research question and meet inclusion criteria.[53]  
14  
15

16 We selected SRs that used systematic methods when searching for and identifying the  
17 evidence in two databases and which evaluated certainty of evidence using the Grading  
18 of Recommendations, Assessment, Development and Evaluation (GRADE)  
19 approach.[54] Briefly, GRADE is a reproducible and transparent methodology widely  
20 adopted by organisations such as the World Health Organization and the Cochrane  
21 Collaboration for making clinical practice recommendations. It classifies certainty or  
22 quality of evidence—that is, the degree of confidence in the results of research on a  
23 given outcome of interest (e.g., irritable bowel syndrome, cancer or obesity)—as high,  
24 moderate, low or very low, according to factors that include the study methodology,  
25 consistency and precision of the results, and directness of the evidence supporting  
26 health claims on webpages.[54] Very low means the true effect is probably substantially  
27 different from the estimated effect; low means the true effect might be markedly  
28 different from the estimated effect; moderate means the true effect is probably close  
29 to the estimated effect and high means the true effect is similar to the estimated  
30 effect.[54-56] Regarding an intervention effect, favourable effect means the  
31 intervention is associated with a beneficial effect on the outcome of interest; no effect  
32 means the intervention is associated with little or no difference to the outcome of  
33 interest; and uncertain means the certainty for an outcome was not reported, the  
34 results were contradictory or effects could not be estimated.[57] The claims about the  
35 effect (favourable effect/no effect/uncertain effect) and certainty of evidence  
36 (high/moderate/low/very low) were coded by two authors (APB and MR). When more  
37 than one SR was obtained, we prioritized the most recent and for two SRs published the  
38 same year, we prioritized the Cochrane SR.[56] If certainty of evidence differed across  
39 outcomes stated in webpages for the same intervention, overall certainty of evidence  
40 was understood as the lowest GRADE classification registered.[56] For search phrases  
41 used in the search for SRs in the Cochrane Library and PubMed, see reference [58].  
42  
43  
44  
45  
46  
47  
48  
49

### 50 **Quality of information**

51  
52 MB and GC separately analysed the quality of online information based on whether it  
53 met the following 10 criteria. The selection of said criteria was based on the only  
54 available SR of the quality of information on health interventions [59] and two other  
55 relevant papers [60, 61]. The criteria used were: 1) provides references or links to  
56 scientific publications; 2) explains the conclusions of scientific publications; 3) quantifies  
57 relative effects; 4) quantifies absolute effects; 5) acknowledges some research  
58 limitations (e.g., preliminary results, small studies, conflicts of interests and differing  
59  
60

1  
2  
3 results between studies); 6) generally discusses certainty of evidence (e.g., aligning  
4 wording depending on whether the studies are observational or experimental);[62] 7)  
5 reports potential harms; 8) reports on available alternatives; 9) discusses intervention  
6 costs; and 10) does not make arguments based on personal experiences or anecdotes.  
7 For each criterion, the story was given a rating of 'satisfactory' or 'unsatisfactory'.  
8  
9

10 All discrepancies in coding were resolved through discussion with a third author (APB)  
11 so that the final concordance was 100%. As there were only two raters rating the same  
12 sample, Cohen's kappa was used to calculate inter-rater agreement. Data are reported  
13 as kappa and its 95% CI. We considered a kappa of between 0.41 and 0.60 as a  
14 'moderate' agreement, between 0.61 and 0.80 as a 'substantial' agreement and  
15 between 0.81 and 1.00 as an 'almost perfect' one.[63]  
16  
17  
18

### 19 **Statistical analysis**

20  
21 Categorical variables were described by their absolute frequencies and percentages and  
22 continuous variables were reported as median and interquartile range (IQR) assuming  
23 the data did not fit a normal distribution, which was verified using the Shapiro-Wilk test.  
24  
25

26 We used Fisher's exact test to compare webpage typologies and the  $\chi^2$  test applying a  
27 Bonferroni correction to compare portrayals of health claims. We used a non-parametric  
28 Kruskal-Wallis test to compare information quality score in different interventions and  
29 webpage typologies. Statistical significance was set at  $p < 0.05$  and the actual p value is  
30 reported in the results section for each comparison. Version 3.5.2 of the R software  
31 (SPSS Inc., Chicago, IL, USA) and version 4.7.0.0 of the Joinpoint Regression Program  
32 were used for all analysis work.  
33  
34  
35

### 36 **Patient and public involvement**

37  
38 This research was carried out without patient or public involvement in the design of the  
39 study, the interpretation of the results, or the writing or editing of this document.  
40  
41

## 42 **RESULTS**

43  
44 The two primary types of webpages were commercial (23.7%, 27/114) and news  
45 webpages (23.7%, 27/114), followed by professional webpages (hospitals, universities  
46 and healthcare professionals) (14.0%, 16/114) and health portals (12.3%, 14/114). All  
47 other eligible webpage typologies accounted for <10%. Five webpages corresponded to  
48 scientific publications relating to fibre (2.6%, 3/114) and prebiotics (1.8%, 2/114).  
49  
50  
51

### 52 **The certainty of the evidence supporting health claims**

53  
54 All the webpages discussed interventions in relation to at least one health claim. In total,  
55 there were 133 different health claims for which probiotics, yoghurt, kefir, kombucha,  
56 fibre and prebiotics were portrayed as beneficial (for a complete list, see reference [64]).  
57 The most frequently reported reason for eating the food or taking the supplement was  
58 to reverse an altered gut microbiome (i.e., 'dysbiosis') secondary to an unbalanced diet  
59  
60

1  
2  
3 or stressful lifestyle, treatment with antibiotics or disease. The four primary and most  
4 widely portrayed health claim topics for all interventions were gastrointestinal health  
5 (86.0%, 98/114), vague claims about maintaining or improving health without any  
6 reference to a specific condition ('Other') (57.9%, 66/114), cardiovascular health (53.5%,  
7 61/114) and immune system health (i.e., infections, allergies, boosting the immune  
8 system) (50.9%, 58/114). The immune system-related health claims for kefir were  
9 overrepresented compared to fibre ( $p=0.008$ ). For fibre, the overrepresentation of  
10 health claims related to cardiovascular diseases was higher and statistically significant  
11 compared to probiotics ( $p=0.004$ ) and the overrepresentation of health claims related  
12 to cancer was higher and statistically significant compared to probiotics ( $p=0.009$ ) and  
13 prebiotics ( $p=0.044$ ). The overrepresentation of general health claims ('Other') for  
14 kombucha was higher and statistically significant compared to fibre ( $p=0.002$ ) and  
15 prebiotics ( $p=0.016$ ) (Figure 1).  
16  
17  
18  
19

20 [Figure 1]  
21

22 Of the total of 133 health claims, only half (52.6%, 70/133) were supported by evidence  
23 from SRs. Probiotics (54.7%, 29/53), yoghurt (42.6%, 20/47) and fibre (37.1%, 13/35)  
24 had the highest number of online health claims supported by evidence from SRs. None  
25 of the 55 online health claims for kombucha was supported by evidence from SRs (Figure  
26 2).  
27  
28  
29

30 [Figure 2]  
31

32 The health claims that appeared on the greatest number of webpages were not  
33 necessarily the ones with the highest certainty of evidence (Figure 3). In the context of  
34 gastrointestinal health, the highest certainty of evidence was found for the prevention  
35 of antibiotic-associated diarrhoea for probiotics and yoghurt (moderate certainty of  
36 evidence) and the prevention and treatment of infectious diarrhoea and hepatic  
37 encephalopathy for prebiotics (moderate certainty of evidence). The prevention of  
38 acute otitis media was the immune system-related health claim supported by moderate  
39 evidence for probiotics and yoghurt. Fibre was the intervention with the highest number  
40 of online health claims supported by high (reduction of cholesterol and triglyceride  
41 levels) to moderate (reduction in obesity, type 2 diabetes, cardiovascular disease  
42 mortality, hypertension, coronary heart disease incidence and colorectal cancer  
43 incidence) certainty of evidence (for the complete dataset, see reference [64]).  
44  
45  
46  
47

48 [Figure 3]  
49

## 50 Quality of information 51

52 After assessing the quality of the online information by applying the 10 criteria as  
53 described in the Methods section, we obtained a score of between 0 and 10 for all  
54 webpages. Figure 4 displays the median information quality score by intervention and  
55 webpage typology. The median quality score by intervention was 3, IQR [2, 4] and was  
56 not significantly different across all interventions. Scientific journal webpages had the  
57 highest quality score of all typologies, with a significantly higher median than  
58  
59  
60

commercial ( $p=0.009$ ), health portals ( $p=0.030$ ), news ( $p=0.026$ ) and professional webpages ( $p=0.026$ ).

[Figure 4]

Table 1 shows how quality criteria ranked among all interventions. While 39.5% of all webpages provided references or links to scientific publications, only a minority (18.4%, 21/114) adequately explained the key messages and conclusions of the paper's content.

Table 1. Webpages informing about probiotics, yoghurt, kefir, kombucha, fibre and prebiotics that meet each information quality criterion.

| Quality criteria                                              | All webpages (%)<br>n=114 | Probiotics (%)<br>n=19 | Yoghurt (%)<br>n=17 | Kefir (%)<br>n=20 | Kombucha (%)<br>n=20 | Fibre (%)<br>n=20 | Prebiotics (%)<br>n=18 |
|---------------------------------------------------------------|---------------------------|------------------------|---------------------|-------------------|----------------------|-------------------|------------------------|
| 1. Provides references or links to scientific publications    | 45 (39.5)                 | 11 (57.9)              | 5 (29.4)            | 6 (30.0)          | 5 (25.0)             | 9 (45.0)          | 9 (50.0)               |
| 2. Explains conclusions of scientific publications            | 21 (18.4)                 | 5 (26.3)               | 3 (17.7)            | 4 (20.0)          | 2 (10.0)             | 4 (20.0)          | 3 (16.7)               |
| 3. Quantifies relative effects                                | 9 (7.9)                   | 1 (5.3)                | 1 (5.9)             | 2 (10.0)          | 1 (5.0)              | 3 (15.0)          | 2 (11.1)               |
| 4. Quantifies absolute effects                                | 2 (1.8)                   | 0                      | 0                   | 0                 | 0                    | 1 (5.0)           | 1 (5.6)                |
| 5. Acknowledges some research limitations                     | 33 (28.9)                 | 8 (42.1)               | 6 (35.3)            | 3 (15.0)          | 3 (15.0)             | 6 (30.0)          | 7 (38.9)               |
| 6. Generally discusses certainty of evidence                  | 18 (15.8)                 | 5 (5.9)                | 1 (5.9)             | 1 (5.0)           | 4 (20.0)             | 3 (15.0)          | 4 (22.2)               |
| 7. Reports potential harms                                    | 48 (42.1)                 | 5 (26.3)               | 1 (5.9)             | 12 (60.0)         | 13 (65.0)            | 11 (55.0)         | 6 (33.3)               |
| 8. Reports on available alternatives                          | 49 (43.0)                 | 14 (73.7)              | 8 (47.1)            | 7 (35.0)          | 1 (5.0)              | 6 (30.0)          | 13 (72.2)              |
| 9. Discusses intervention costs                               | 4 (3.5)                   | 2 (10.5)               | 1 (5.9)             | 0                 | 1 (5.0)              | 0                 | 0                      |
| 10. Does not argue based on personal experiences or anecdotes | 113 (99.1)                | 18 (94.7)              | 17 (100.0)          | 20 (100.0)        | 18 (90.0)            | 20 (100.0)        | 20 (100.0)             |

Most webpages used verbal descriptions to explain intervention health benefits and did not quantify effects. Only 7.9% (9/114) of webpages quantified relative effects, including the five scientific journal webpages, of which only two included absolute effects.

Overall, only one third of webpages (28.9%, 33/114) stated some of the limitations of research findings. Mentions of limitations included, for example, acknowledging that research that supports health benefits is still in its early stages; stating that the food can improve a condition for a few people in limited circumstances but it cannot be extrapolated to other people due to the small sample studied; addressing conflicts of interest; and highlighting discrepancies between studies that mean the intervention may not be recommended for all indications. Only 15.8% of webpages (18/114) provided a general discussion of the certainty of the evidence supporting an intervention's benefits through consistent words and phrases that depended on whether the studies

1  
2  
3 were observational (i.e., using cautionary phrases such as ‘The results suggest’ and  
4 conditional verb tenses) or experimental (i.e., using verbs that indicate causality such as  
5 ‘lead to’, ‘reduce’ or ‘increase’). Other means of properly communicating the certainty  
6 of the evidence included stating that effects were currently under investigation or more  
7 research was needed to consider an intervention in the context of a specific condition.  
8 There were webpages, for example, that used a language of uncertainty, mentioning  
9 that, “The health benefits of the probiotics and prebiotics that are currently available  
10 have not been proven conclusively” or “For now, science does not know which of kefir’s  
11 components are responsible for its health benefits.” A further phrase mentioned how  
12 “There is not enough evidence that kombucha tea is as good for your health as some  
13 say.”  
14  
15  
16

17  
18 Only 42.1% of webpages mentioned or adequately discussed the potential harms of the  
19 intervention. Harms were reported in more than a half of webpages on kombucha  
20 (65.0%, 13/20), kefir (60.0%, 12/20) and fibre (55.0%, 11/20), but only in a quarter of  
21 webpages on probiotics (26.3%, 5/19). Similarly, less than half of webpages (43.0%,  
22 49/114) reported available alternatives to the main intervention (i.e., in the form of food  
23 or food supplements). The reporting of costs only appeared in 3.5% (4/114) of all  
24 webpages.  
25  
26

27  
28 Some commercial (19.3%, 22/114), health portals (9.6%, 11/114), news (7.0%, 8/114)  
29 and professional webpages (6.1%, 7/114) included a direct recommendation to  
30 consume the food or supplement. Webpages reporting on the potential harms also  
31 recommended not consuming the food or supplement under specific circumstances  
32 (e.g., avoiding probiotics and kombucha in immunocompromised adults). The  
33 recommendation of consulting a healthcare professional was included in a third of all  
34 webpages (28.1%, 32/114).  
35  
36

37  
38 While for the criterion of acknowledging some research limitations the inter-rater  
39 agreement was 56% with Cohen’s kappa of 0.253 (95% CI: 0.095 to 0.411), for the  
40 remaining variables, the inter-rater agreement was higher than 70% with Cohen’s kappa  
41 of between 0.420 (95% CI: 0.234 to 0.605) and 0.929 (95% CI: 0.849 to 1.008),  
42 demonstrating ‘moderate’ to ‘almost perfect’ agreement.[63] See reference [52] for  
43 inter-rater agreement results.  
44  
45

## 46 **DISCUSSION**

47  
48 Our study shows that most online health claims for probiotics, yoghurt, kefir, kombucha,  
49 fibre and prebiotics are supported by low to very low certainty of evidence.  
50 Furthermore, the overall quality of information on the gut microbiome-related  
51 interventions studied was low, with a median quality score of 3 on a scale of 0 to 10 for  
52 all interventions when applying our 10 quality criteria.  
53  
54

55  
56 On webpage typology, results were not surprising. The prominent presence of  
57 commercial (23.7%) and news (23.7%) webpages in Spanish is in line with previous  
58 results on webpage content on probiotics in English.[42, 43] Our findings reflect  
59  
60



1  
2  
3 companies' interest in therapeutically exploiting the microbiome[42, 43] and the  
4 newsworthiness of the topic.[2-4]  
5

6  
7 Regarding the first objective, both the plethora of beneficial health claims for dietary  
8 interventions intended to improve health through the gut microbiome and the weak  
9 evidence base supporting such health claims were also expected. All in all, our data add  
10 valuable details for better understanding the online information to which audiences are  
11 exposed.  
12

13  
14 First, our research finds that probiotics, fermented foods, fibre and prebiotics might be  
15 beneficial for 133 health indications. Similarly, Marcon *et al.* found that American and  
16 Canadian general newspapers mentioned up to 138 different health topics for which  
17 microbiome-related interventions were portrayed as beneficial.[4] However, very few  
18 of those purported benefits are supported by the evidence and integrated into clinical  
19 practice. Thus, while fibre has a long history of use in the clinical setting,[17] the degree  
20 to which probiotics are recommended to patients by healthcare professionals is  
21 variable.[39, 65] Factors explaining why some specialist doctors do not recommend  
22 probiotics include the perceived lack of research evidence and poor knowledge  
23 regarding use and cost.[66, 67] While uncertainty remains around the optimal use of  
24 probiotics,[15] the perception among patients who seek advice from  
25 gastroenterologists is that probiotics improve general health, longevity and  
26 gastrointestinal symptoms.[68]  
27  
28  
29

30  
31 Second, we found gastrointestinal health and immune system health-related indications  
32 are among the most widely mentioned benefits, which is in line with Neunez *et al.*'s  
33 findings for probiotics.[43] However, the concepts of 'boosting gut health' and 'boosting  
34 immunity', the latter of which spiked on the internet during the COVID-19 pandemic,[41]  
35 are misleading and scientifically inaccurate.[50, 69]  
36  
37  
38

39  
40 Third, the evidence-based benefit of probiotics and yoghurt for preventing antibiotic-  
41 associated diarrhoea that appeared in most webpages is supported by moderate  
42 certainty of evidence,[70] while certainty of evidence is low and very low for irritable  
43 bowel syndrome[71] and infectious diarrhoea,[72] respectively, both of which appear in  
44 a high number of search results. Conversely, although there is moderate certainty of  
45 evidence of probiotics' role in preventing mortality and infections secondary to  
46 necrotising enterocolitis in very preterm infants or infants with a very low birth  
47 weight,[73] that health benefit only appeared in a few of the webpages that discussed  
48 probiotics (21.1%, 4/19). When interpreting SRs that perform a meta-analysis of  
49 probiotics, it should be acknowledged that their conclusions can be misleading if  
50 different strains or combinations of probiotics at different doses are grouped together  
51 inappropriately and studies include different patient populations and measure different  
52 outcomes.[37, 74] That may cloud any potential signalling of the probiotic for preventing  
53 or treating diseases and may contribute to explaining why only 54.7% of probiotic-  
54 related health claims are supported by evidence from SRs.[74] The low number of health  
55 claims for yoghurt (42.6%, 20/47) and kefir (1.8%, 1/55), supported by evidence from  
56 SRs, coincides with our previous findings using the GRADE approach, which showed that  
57 consuming probiotics in the form of fermented milks such as yoghurt and kefir may not  
58  
59  
60

1  
2  
3 be associated with any health benefits, with either low or very low certainty of  
4 evidence.[75] None of the health claims for kombucha was supported by evidence from  
5 SRs, which is expected due to the lack of controlled human studies investigating the  
6 potential health effects of this popular fermented drink.[16, 76]  
7  
8

9 Fourth, not surprisingly given its common use among healthcare professionals in  
10 gastrointestinal disorders,[17] fibre was the intervention with the most health claims  
11 supported by high (reduction of cardiovascular disease risk factors)[18] to moderate  
12 (protection against colorectal cancer)[77] certainty of evidence. The efficacy of  
13 prebiotics for preventing constipation supported by low certainty of evidence[78]  
14 appeared in a high proportion of webpages. In contrast, the more widely studied  
15 indication of prebiotics for managing hepatic encephalopathy, which showed moderate  
16 certainty of evidence,[79] appeared in very few webpages (16.7%, 3/18).  
17  
18

19  
20 Regarding the second objective, the assessment of information quality carried out using  
21 our 10-criteria score shows interesting data on both overall quality and some specific  
22 shortcomings.  
23  
24

25 First, the low quality of online information assessed according to our 10 criteria is not  
26 surprising. However, it is even lower than estimated for news reports on health  
27 interventions in general, using other indices or scales containing common quality  
28 criteria. Thus, in our study, 92.1% of the webpages did not quantify the effects of the  
29 intervention, compared to 72% of the news items analysed by Schwitzer;[60] 84.2% did  
30 not discuss the certainty of the evidence, compared to 65%; and 96.5% did not report  
31 the costs of the intervention, compared to 77%. On two other common criteria, the  
32 results were more similar: 57% of the webpages did not report alternatives to the  
33 intervention, compared to 62% of the news items analysed by Schwitzer; and 57.9% did  
34 not report potential harms, compared to 67%.  
35  
36  
37

38 The first systematic review of the quality of information on health interventions in  
39 traditional media outlets and online resources also found room for improvement as  
40 regards health news.[59] However, nutrition-related information is especially prone to  
41 poor quality and may contribute to public misconceptions about dietary strategies  
42 targeting the gut microbiome and health.[80-84] In our study, retail sites intended for  
43 direct purchase and advertisements were excluded from the analysis; nevertheless, a  
44 quarter of the analysed webpages were commercial. The regulatory status of  
45 commercial information about gut microbiome-related foods and dietary supplements  
46 on webpages is not the same as for a pharmaceutical product. In the case of Spain, in  
47 spite of current legislation on commercial information related to foods and food  
48 supplements,[85-87] misleading food marketing prevails. Regulating digital marketing is  
49 not straightforward because of its cross-border nature,[88] but it is critical for making  
50 informed decisions about health. Ongoing voluntary implementation measures  
51 involving the food industry, communications agencies and advertisers are insufficient in  
52 preventing misinformation about popular gut microbiome-related dietary  
53 interventions.[89, 90] To allow consumers to make informed food choices, stricter  
54 regulation of any probiotics, fermented foods, fibre and prebiotics promoted on  
55 websites is required, especially to ensure that the dietary advice to which the public is  
56  
57  
58  
59  
60

1  
2  
3 exposed is based on evidence that is either convincing or probable.[81] Steering clear of  
4 the practice by scientific societies of endorsing prebiotic or probiotic products that have  
5 dubious health benefits may also help with avoiding the spread of inaccurate  
6 information.[91]  
7

8  
9 Another way to improve that situation might be to promote critical thinking among the  
10 public. In other words, it might be better to treat the effects of the current  
11 overabundance of information than to prevent it, since prevention is an almost  
12 impossible task, with exaggerated scientific findings and discoveries always attracting  
13 those who produce and recirculate information.[59, 92] In that regard, we present our  
14 suggested 10 criteria for quality of information, aimed at three different groups. First,  
15 healthcare providers as a tool for recommending reliable webpages on gut microbiome-  
16 related interventions to their patients; second, journalists and communicators involved  
17 in disseminating microbiome research findings; and third, the lay public to guide them  
18 every time they face a piece of online information related to the gut microbiome.  
19  
20  
21

22  
23 Second, the strategy of including scientific references embedded in the text or as a list  
24 at the end of text (criterion 1) without explaining the conclusions of the scientific  
25 publications (criterion 2) is an example of how the 'health halo effect' around gut health  
26 and the microbiome is used to validate certain unproven alternative therapies.[4, 41] In  
27 addition, webpages also misrepresent the term 'probiotic', which is inadequately used  
28 to refer to kombucha and kefir and as an umbrella for all probiotic supplements, when,  
29 in actual fact, not all probiotics are backed by science and not all fermented foods can  
30 be considered probiotics.[16, 93] Likewise, many webpages use the term 'dysbiosis' as  
31 a reason to promote interventions with the connotation that an 'altered' microbiome in  
32 someone with a specific disease is causal or contributory, even though it is not always  
33 certain that changing the altered microbiome is beneficial[94] and the definition of a  
34 healthy microbiome is not known.[95]  
35  
36  
37

38  
39 Third, it is also worth noting that the majority of webpages only provide a qualitative  
40 description of the health claims without quantifying them (criteria 3 and 4). The few  
41 webpages that quantified the effects did so only in relative numbers (7.9%, 9/114),  
42 which tend to be more eloquent, are often misleading and can lead to a misguided  
43 perception of the reported effects.[94, 96] Only two out of five scientific journal  
44 webpages included absolute effects. Indeed, the microbiome field relies too heavily on  
45 relative numbers of microorganisms.[94] For instance, one clear example of numerical  
46 misinterpretation is the long-assumed ratio, widely disseminated in the media and the  
47 scientific literature, that humans have 10 times more microbial cells than body cells.[97]  
48  
49  
50

51  
52 Fourth, the observation that only a few webpages acknowledged some research  
53 limitations (criterion 5) (28.9%, 33/114) and discussed the certainty of the evidence  
54 (criterion 6) (15.8%, 18/114) is common when informing on microbiome-related  
55 interventions. For instance, social media content rarely makes critical references to  
56 microbiome research findings and the only acknowledgments of limitations found are  
57 suggestions around the need for more research.[34] Likewise, previous findings show  
58 that only 19% of articles in English-language newspapers[4] and less than 10% of  
59 webpages portraying immune boosting strategies, including the use of probiotics and  
60

1  
2  
3 prebiotics,[41] report microbiome-related limitations (e.g., suggesting that the health  
4 benefits of and current research on the microbiome might be unproven, ineffective or  
5 exaggerated). Probiotics was the intervention with the highest proportion of webpages  
6 that provided limitations and comments around the certainty of the evidence, which  
7 might be explained by probiotics' status as the most widely studied subject when  
8 compared to fermented foods such as kefir and kombucha.[14, 15]  
9  
10

11 Fifth, only a minority of webpages on probiotics informed of adverse effects (criterion  
12 7) and included advice against consumption by people with severe illnesses or  
13 compromised immune systems.[98] Previous analyses of online messages about  
14 probiotics also found that descriptions of their benefits outnumbered the descriptions  
15 of their risks, and the latter appeared significantly less on commercial webpages.[42, 43]  
16 That may be rooted in the lack of safety data in randomized controlled trials for  
17 probiotics.[99] Safety issues are also a concern for kombucha, with reports of varying  
18 degrees of adverse effects in relation to kombucha tea consumption,[100] while fibre  
19 and prebiotics are limited to mild issues such as abdominal discomfort, bloating and  
20 gas.[17]  
21  
22  
23  
24

25 As dietary interventions that target the gut microbiome are usually regulated as foods  
26 and dietary supplements and not drugs, none of the health claims promoted on the  
27 internet need to be backed up by studies in humans. In addition, what it is actually in a  
28 probiotic or dairy product does not necessarily coincide with what it is declared on the  
29 label.[101] In the best-case scenario, the product may be ineffective and the only likely  
30 harm is to the consumer's wallet. In the worst-case scenario, however, a product can  
31 have significant side effects. That is the case with the hepatotoxic effects reported from  
32 kombucha intake[100], the increased risk of pre-eclampsia with probiotic  
33 administration[102] and the increased risk of mortality in adult patients with acute  
34 pancreatitis who receive probiotics.[103] Finally, self-consumption of these kind of  
35 foods and supplements as a non-prescribed alternative treatment due to the  
36 consumer's unfounded expectations, which outpace the scientific evidence, can lead to  
37 a delay in the presentation and resolution of a medical diagnosis and the search for  
38 effective treatment.  
39  
40  
41  
42  
43

44 Our study shows two strengths. First, for the evaluation of online health claims, we  
45 relied on systematic reviews and assessments of the degree of certainty of evidence  
46 using the GRADE approach, which is a systematic, explicit and transparent  
47 methodological framework for grading certainty of evidence.[104, 105] Second, the  
48 authors have extensive knowledge of and experience in the fields of nutrition, evidence-  
49 based medicine, science journalism and microbiome research communication.  
50  
51

52 There are also several limitations to this study. First, we used single search phrases to  
53 perform the searches. That meant we could not explore differences in results for other  
54 search terms, which can vary in the current context of the COVID-19 pandemic. Second,  
55 the data set only includes Spanish-language webpages and focuses on the initial search  
56 results, although it must be acknowledged that the top 20 search results have a higher  
57 chance of being read.[47, 48] Third, we only focused on 10 parameters for assessing  
58 quality of information. Fourth, we did not analyse information published on social media  
59  
60

1  
2  
3 channels, which provide relevant sources for people seeking nutrition advice online.  
4 Last, we analysed the certainty of the evidence behind online health claims based only  
5 on systematic reviews, which are currently the evidence synthesis tool that offers the  
6 highest level of evidence.  
7

## 8 9 **CONCLUSION**

10  
11 Online information on probiotics, fermented foods, fibre and prebiotics does not reflect  
12 the available body of scientific evidence and is often incomplete and of a poor quality.  
13 The observation that the majority of health claims that appeared on the largest number  
14 of webpages were not necessarily the ones with the highest certainty of evidence may  
15 contribute to distorting the message about the impact of foods on health linked to their  
16 effects on the gut microbiome. Furthermore, the fact that research results, the  
17 quantification of the effects, limitations and uncertainty of the evidence, and the  
18 adverse effects, cost and alternatives of interventions are not usually addressed can  
19 distort public perception of the topic. Consequently, online information about the six  
20 interventions considered in this study may, in some cases, create a potentially harmful  
21 distraction rather than a key element for maintaining health and quality of life.  
22  
23  
24  
25

## 26 27 **CONTRIBUTORS**

28  
29 APB and GC designed the research with input from MR and MB. APB, MR, MB and GC  
30 performed the research and analysed the data. APB and GC interpreted the data. APB  
31 wrote the manuscript. MR, MB and GC were involved in drafting and revising the  
32 manuscript. All authors approved the final version to be published and agreed to be  
33 accountable for all aspects of the work.  
34  
35

## 36 37 **COMPETING INTERESTS**

38  
39 APB works as a health writer for companies commercially involved in the gut microbiota  
40 and probiotics. MR, MB and GC have declared no competing interests.  
41

## 42 43 **FUNDING**

44  
45 The authors have not declared a specific grant for this research from any funding agency  
46 in the public, commercial or not-for-profit sectors.  
47

## 48 49 **DATA AVAILABILITY STATEMENT**

50  
51 All data relevant to the study are included in a public, open access repository. The data  
52 set is available:

53 [https://figshare.com/articles/journal\\_contribution/Supplemental\\_material\\_1/2020341](https://figshare.com/articles/journal_contribution/Supplemental_material_1/2020341)

54 [5](#)

55 [https://figshare.com/articles/journal\\_contribution/Table\\_S2/19425824](https://figshare.com/articles/journal_contribution/Table_S2/19425824)

56 [https://figshare.com/articles/journal\\_contribution/Supplemental\\_material\\_3/2020402](https://figshare.com/articles/journal_contribution/Supplemental_material_3/2020402)

57 [1](#)  
58  
59  
60

[https://figshare.com/articles/journal\\_contribution/Supplemental\\_material\\_4/20204270](https://figshare.com/articles/journal_contribution/Supplemental_material_4/20204270)

## ETHICS APPROVAL

Patient consent for publication is not required.

## ORCID iD

Andreu Prados-Bo <https://orcid.org/0000-0003-4393-9723>

Montserrat Rabassa <https://orcid.org/0000-0002-0276-6726>

Mireia Bosch <https://orcid.org/0000-0003-4795-2669>

Gonzalo Casino <https://orcid.org/0000-0003-1872-4130>

## TWITTER:

@andreuprados, @MontseRabassa, @mboschpujadas, @gonzalocasino

## REFERENCES

- 1 Shan Y, Segre JA, Chang EB. Responsible stewardship for communicating microbiome research to the press and public. *Nat Med* 2019;25(6):872–4 doi: 10.1038/s41591-019-0470-y [published Online First: 27 May 2019].
- 2 Prados-Bo A, Casino G. Microbiome research in general and business newspapers: how many microbiome articles are published and which study designs make the news the most? *PLOS ONE* 2021;16(4):e0249835 doi:10.1371/journal.pone.0249835
- 3 Prados-Bo A, Casino G. How have quality newspapers covered the microbiome? A content analysis of *The New York Times*, *The Times*, and *El País*. *Journalism Published Online First*: 21 January 2022. doi: 10.1177/146488492111067858
- 4 Marcon AR, Turvey S, Caulfield T. ‘Gut health’ and the microbiome in the popular press: a content analysis. *BMJ Open* 2021;11(7):e052446 doi:10.1136/bmjopen-2021-052446
- 5 O’Hara AM, Shanahan F. The gut flora as a forgotten organ. *EMBO Rep* 2006;7(7):688–93 doi: 10.1038/sj.embor.7400731 [published Online First: 1 July 2006].
- 6 Valdes AM, Walter J, Segal E, et al. Role of the gut microbiota in nutrition and health. *BMJ* 2018;361:j2179 doi:10.1136/bmj.j2179
- 7 Murray N, Al Khalaf S, Kaulmann D, et al. Compositional and functional alterations in the oral and gut microbiota in patients with psychosis or schizophrenia: a systematic review. *HRB Open Res* 2021;4:108 doi: 10.12688/hrbopenres.13416.1
- 8 Walter J, Armet AM, Finlay BB, et al. Establishing or exaggerating causality for the gut microbiome: lessons from human microbiota-associated rodents. *Cell* 2020;180(2):221–32 doi: 10.1016/j.cell.2019.12.025 [published Online First: 23 January 2020].

1  
2  
3 9 Vujkovic-Cvijin I, Sklar J, Jiang L, et al. Host variables confound gut microbiota studies  
4 of human disease. *Nature* 2020;587(7834):448–54 doi: 10.1038/s41586-020-2881-9  
5 [published Online First: 4 November 2020].  
6

7 10 Bar N, Korem T, Weissbrod O, et al. A reference map of potential determinants for  
8 the human serum metabolome. *Nature* 2020;588(7836):135–40 doi: 10.1038/s41586-  
9 020-2896-2 [published Online First: 11 November 2020].  
10

11 11 Asnicar F, Berry SE, Valdes AM, et al. Microbiome connections with host  
12 metabolism and habitual diet from 1,098 deeply phenotyped individuals. *Nat Med*  
13 2021;27(2):321–32 doi: 10.1038/s41591-020-01183-8 [published Online First: 11  
14 January 2021].  
15

16 12 Cotillard A, Cartier-Meheust A, Litwin NS, et al. A posteriori dietary patterns better  
17 explain variations of the gut microbiome than individual markers in the American Gut  
18 Project. *Am J Clin Nutr* 2022;115(2):432–43 doi: 10.1093/ajcn/nqab332 [published  
19 Online First: 7 October 2021].  
20

21 13 Rothschild D, Weissbrod O, Barkan E, et al. Environment dominates over host  
22 genetics in shaping human gut microbiota. *Nature* 2018;555(7695):210–5  
23 doi:10.1038/nature25973 [published Online First: 28 February 2018].  
24

25 14 World Gastroenterology Organisation. Probiotics and prebiotics. 2017. Available:  
26 <https://www.worldgastroenterology.org/guidelines/probiotics-and-prebiotics>  
27 [Accessed 9 Feb 2022].  
28

29 15 Su GL, Ko CW, Bercik P, et al. AGA clinical practice guidelines on the role of  
30 probiotics in the management of gastrointestinal disorders. *Gastroenterology*  
31 2020;159(2):697–705 doi: 10.1053/j.gastro.2020.05.059 [published Online First: 1  
32 August 2020].  
33

34 16 Marco ML, Sanders ME, Gänzle M, et al. The International Scientific Association for  
35 Probiotics and Prebiotics (ISAPP) consensus statement on fermented foods. *Nat Rev*  
36 *Gastroenterol Hepatol* 2021;18(3):196–208 doi: 10.1038/s41575-020-00390-5  
37 [published Online First: 4 January 2021].  
38

39 17 Gill SK, Rossi M, Bajka B, et al. Dietary fibre in gastrointestinal health and disease.  
40 *Nat Rev Gastroenterol Hepatol* 2021;18(2):101–16 doi: 10.1038/s41575-020-00375-4  
41 [published Online First: 18 November 2020].  
42

43 18 Chiavaroli L, Nishi SK, Khan TA, et al. Portfolio dietary pattern and cardiovascular  
44 disease: a systematic review and meta-analysis of controlled trials. *Prog Cardiovasc Dis*  
45 2018;61(1):43–53 doi: 10.1016/j.pcad.2018.05.004 [published Online First: 26 May  
46 2018].  
47

48 19 Yang Y, Zhao LG, Wu QJ, et al. Association between dietary fiber and lower risk of  
49 all-cause mortality: a meta-analysis of cohort studies. *Am J Epidemiol*  
50 2015;181(2):83–91 doi: 10.1093/aje/kwu257  
51

52 20 Gibson GR, Hutkins R, Sanders ME, et al. Expert consensus document: The  
53 International Scientific Association for Probiotics and Prebiotics (ISAPP) consensus  
54 statement on the definition and scope of prebiotics. *Nat Rev Gastroenterol Hepatol*  
55 2017;14(8):491–502 doi: 10.1038/nrgastro.2017.75  
56

57 21 National Science Board. Science & engineering indicators 2018. In: Science and  
58 technology: public attitudes and understanding. Alexandria, VA: National Science  
59 Foundation; 2018. pp. 7-1-7-92. Available:  
60 [https://www.nsf.gov/statistics/2018/nsb20181/report/sections/science-and-  
technology-public-attitudes-and-understanding/highlights](https://www.nsf.gov/statistics/2018/nsb20181/report/sections/science-and-technology-public-attitudes-and-understanding/highlights) [Accessed 9 Feb 2022].

22 Departamento de Agricultura, Ganadería, Pesca y Alimentación y Observatorio de la Comunicación Científica. *La información alimentaria a debate. ¿Qué pide la sociedad?*, 2021. Available:

[https://www.upf.edu/documents/2725122/241382403/AyC\\_1\\_ES.pdf/11fc1e95-ca4e-4797-8f0b-31d7b85cdc3f](https://www.upf.edu/documents/2725122/241382403/AyC_1_ES.pdf/11fc1e95-ca4e-4797-8f0b-31d7b85cdc3f) [Accessed 9 Feb 2022].

23 Chaffey D. Search engine marketing statistics 2022. Smart Insights, 2022. Available: <https://www.smartinsights.com/search-engine-marketing/search-engine-statistics/> [Accessed 9 Feb 2022].

24 The eBusiness. Top 15 best search Engines, 2021. Available:

<http://www.ebizmba.com/articles/search-engines> [Accessed 9 Feb 2022].

25 Ramaswami P. A remedy for your health-related questions: Health info in the knowledge graph. Google official blog, 2015. Available:

<https://blog.google/products/search/health-info-knowledge-graph/> [Accessed 9 Feb 2022].

26 Helm J, Jones RM. Practice paper of the Academy of Nutrition and Dietetics: social media and the dietetics practitioner: opportunities, challenges, and best practices. *J Acad Nutr Diet* 2016;116(11):1825–35 doi: 10.1016/j.jand.2016.09.003 [published Online First: 24 October 2016].

27 Nagler RH. Adverse outcomes associated with media exposure to contradictory nutrition messages. *J Health Commun* 2014;19(1):24–40 doi:

10.1080/10810730.2013.798384 [published Online First: 11 October 2013].

28 Williams G, Hamm MP, Shulhan J, et al. Social media interventions for diet and exercise behaviours: a systematic review and meta-analysis of randomised controlled trials. *BMJ Open* 2014;4:e003926 doi: 10.1136/bmjopen-2013-003926

29 Vijaykumar S, McNeill A, Simpson J. Associations between conflicting nutrition information, nutrition confusion and backlash among consumers in the UK. *Public Health Nutr* 2021;24(5):914–23 doi: 10.1017/S1368980021000124 [published Online First: 12 January 2021].

30 Marcon A. Microbiome research, nutrition, and social media: a messaging muddle. UNSCN nutrition 45: nutrition in a digital world, 2020. Available:

<https://www.unscn.org/en/Unscn-news?idnews=2082> [Accessed 9 Feb 2022].

31 Hanage WP. Microbiology: microbiome science needs a healthy dose of scepticism. *Nature* 2014;512(7514):247–8 doi: 10.1038/512247a [published Online First: 20 August 2014].

32 Neiderhuber M. The human microbiome and media confusion. Science News, 2015. Available: <https://sitn.hms.harvard.edu/flash/2015/the-human-microbiome-and-media-confusion/> [Accessed 9 Feb 2022].

33 Bik EM. The hoops, hopes, and hypes of human microbiome research. *Yale J Biol Med* 2016;89(3):363–73 [published Online First: 30 September 2016].

34 Hooks KB, Konsman JP, O'Malley MA. Microbiota-gut-brain research: a critical analysis. *Behav Brain Sci* 2019;42:e60 doi: 10.1017/S0140525X18002133 [published Online First: 12 September 2018].

35 Eisen JA. Blog of Jonathan A. Eisen, Professor at U.C. Davis. Microbiomania. 2014. Available: <https://phylogenomics.blogspot.com/p/blog-page.html> [Accessed 9 Feb 2022].

36 de Simone C. The unregulated probiotic market. *Clin Gastroenterol Hepatol* 2019;17(5):809–17 doi: 10.1016/j.cgh.2018.01.018



- 1  
2  
3 37 Suez J, Zmora N, Segal E, et al. The pros, cons, and many unknowns of probiotics.  
4 *Nat Med* 2019;25(5):716–29 doi: 10.1038/s41591-019-0439-x  
5  
6 38 Schmidt C. The startup bugs. *Nat Biotechnol* 2013;31(4):279–81. doi:  
7 10.1038/nbt.2544  
8 39 Dimidi E, Cox C, Scott SM, et al. Probiotic use is common in constipation, but only a  
9 minority of general and specialist doctors recommend them and consider there to be  
10 an evidence base. *Nutrition* 2019;61:157–63 doi: 10.1016/j.nut.2018.11.013 [published  
11 Online First: 23 November 2018].  
12  
13 40 Mercer MB, Brinich MA, Geller G, et al. How patients view probiotics: findings from  
14 a multicenter study of patients with inflammatory bowel disease and irritable bowel  
15 syndrome. *J Clin Gastroenterol* 2012;46(2):138–44 doi:  
16 10.1097/MCG.0b013e318225f545 [published Online First: February 2012].  
17  
18 41 Rachul C, Marcon AR, Collins, et al. COVID-19 and ‘immune boosting’ on the  
19 internet: a content analysis of Google search results. *BMJ Open* 2020;10(10):e040989  
20 doi:10.1136/bmjopen-2020-040989  
21  
22 42 Brinich MA, Mercer MB, Sharp RR. An analysis of online messages about probiotics.  
23 *BMC Gastroenterol* 2013;13:5 doi:10.1186/1471-230X-13-5 [published Online First: 11  
24 January 2013].  
25  
26 43 Neunez M, Goldman M, Ghezzi P. Online information on probiotics: does it match  
27 scientific evidence? *Front Med (Lausanne)* 2020;6:296 doi:10.3389/fmed.2019.00296  
28  
29 44 Google trends. Available: <https://trends.google.com/trends/> [Accessed 3 Aug 2021].  
30  
31 45 Answer the public. Available: <https://answerthepublic.com/> [Accessed 3 Aug 2021].  
32 [dataset] 46 Prados A. Popular search terms relating to diet strategies for modulating  
33 the gut microbiome and their relative popularity from 1 August 2020 to 31 August  
34 2021, provided by Google Trends. FigShare, June 30, 2022.  
35 [https://figshare.com/articles/journal\\_contribution/Supplemental\\_material\\_1/2020341](https://figshare.com/articles/journal_contribution/Supplemental_material_1/20203415)  
36 [5](#)  
37  
38 47 Eysenbach G, Köhler C. How do consumers search for and appraise health  
39 information on the world wide web? Qualitative study using focus groups, usability  
40 tests, and in-depth interviews. *BMJ* 2002;324:573 doi: 10.1136/bmj.324.7337.573  
41  
42 48 Petrescu P. Google organic click-through rates in 2014. MOZ, 2014. Available:  
43 <https://moz.com/blog/google-organic-click-through-rates-in-2014> [Accessed 10 Feb  
44 2022].  
45  
46 49 Alioshkin Cheneguín A, Salvat Salvat I, Romay Barrero H, et al. How good is online  
47 information on fibromyalgia? An analysis of quality and readability of websites on  
48 fibromyalgia in Spanish. *BMJ Open* 2020;10(7):e037065 doi: 10.1136/bmjopen-2020-  
49 037065  
50  
51 50 Cassa Macedo A, Vilela de Faria AO, Ghezzi P. Boosting the immune system, from  
52 science to myth: analysis the infosphere with Google. *Front Med (Lausanne)*  
53 2019;6:165 doi: 10.103389/fmed.2019.00165  
54  
55 51 Aslam R, Gibbons D, Ghezzi P. Online information on antioxidants: information  
56 quality indicators, commercial interests, and ranking by Google. *Front Public Health*  
57 2017;5:90 doi: 10.3389/fpubh.2017.00090  
58 [dataset] 52 Prados A. Examples of webpages typologies and calculation of inter-rater  
59 reliability. FigShare, June 30, 2022.  
60 [https://figshare.com/articles/journal\\_contribution/Table\\_S2/19425824](https://figshare.com/articles/journal_contribution/Table_S2/19425824)

- 1  
2  
3 53 Cochrane Collaboration. Evidence-based health care and systematic reviews.  
4 Available: <https://www.cochrane.org/evidence> [Accessed 9 Feb 2022].
- 5 54 Brozek JL, Akl EA, Alonso-Coello P, et al. Grading quality of evidence and strength of  
6 recommendations in clinical practice guidelines. Part 1 of 3. An overview of the GRADE  
7 approach and grading quality of evidence about interventions. *Allergy*  
8 2009;64(5):669–77 doi: 10.1111/j.1398-9995.2009.01973.x
- 9 55 BMJ Best Practice. What is GRADE? September 2019. Available:  
10 <https://bestpractice.bmj.com/info/us/toolkit/learn-ebm/what-is-grade/> [Accessed 25  
11 June 2022].
- 12 56 Rabassa M, Alonso-Coello P, Casino G. Nutrimedia: A novel web-based resource for  
13 the general public that evaluates the veracity of nutrition claims using the GRADE  
14 approach. *PLOS ONE* 2020;15(4):e0232393 doi: 10.1371/journal.pone.0232393
- 15 57 Cochrane Norway. How to write a plain language summary of a Cochrane  
16 intervention review. 2019. Available:  
17 [https://www.cochrane.no/sites/cochrane.no/files/uploads/how\\_to\\_write\\_a\\_cochrane  
18 pls\\_12th\\_february\\_2019.pdf](https://www.cochrane.no/sites/cochrane.no/files/uploads/how_to_write_a_cochrane_pls_12th_february_2019.pdf) [Accessed 10 Feb 2022].
- 19 [dataset] 58 Prados A. Search filters used for the search of systematic reviews in the  
20 Cochrane Library and PubMed. FigShare, June 30, 2022.  
21 [https://figshare.com/articles/journal\\_contribution/Supplemental\\_material\\_3/2020402  
22 1](https://figshare.com/articles/journal_contribution/Supplemental_material_3/20204021)
- 23 59 Oxman M, Larun L, Pérez Gaxiola G, et al. Quality of information in news media  
24 reports about the effects of health interventions: Systematic review and meta-analyses  
25 [version 2; peer review: 4 approved]. *F1000Res* 2022;10:433 doi:  
26 10.12688/f1000research.52894.2
- 27 60 Schwitzer G. How do US journalists cover treatments, tests, products, and  
28 procedures? An evaluation of 500 stories. *PLoS Med* 2008;5(5):e95 doi:  
29 10.1371/journal.pmed.0050095
- 30 61 Bosch F, Escalas C, Forteza A, et al. A checklist for improving drug information in the  
31 general press: the importance of reporting on the phases and uncertainty of research.  
32 *Revista Española de Comunicación en Salud* 2018;9(2):203–14 doi:  
33 10.20318/recs.2018.4498
- 34 62 Santesso N, Glenton C, Dahm P, et al. GRADE guidelines 26: informative statements  
35 to communicate the findings of systematic reviews of interventions. *J Clin Epidemiol*  
36 2020;119:126–35 doi: 10.1016/j.jclinepi.2019.10.014 [published Online First: 8  
37 November 2019].
- 38 63 Landis JR, Koch GG. The measurement of observer agreement for categorical data.  
39 *Biometrics* 1977;33(1):159–74 doi: 10.2307/2529310
- 40 [dataset] 64 Prados A. Complete list of health claims and the certainty of the evidence  
41 supporting them. FigShare, June 30, 2022.  
42 [https://figshare.com/articles/journal\\_contribution/Supplemental\\_material\\_4/2020427  
43 0](https://figshare.com/articles/journal_contribution/Supplemental_material_4/20204270)
- 44 65 Fijan S, Frauwallner A, Varga L, et al. Health professionals' knowledge of probiotics:  
45 an international survey. *Int J Environ Res Public Health* 2019;16(17):3128 doi:  
46 10.3390/ijerph16173128
- 47 66 Subhan Arshad M, Saqlain M, Majeed A, et al. Cross-sectional study to assess the  
48 healthcare professionals' knowledge, attitude and practices about probiotics use in  
49 Pakistan. *BMJ Open* 2021;11:e047494 doi: 10.1136/bmjopen-2020-047494
- 50  
51  
52  
53  
54  
55  
56  
57  
58  
59  
60

- 1  
2  
3 67 Dimidi E, Scott SM, Whelan K. Probiotics and constipation: mechanisms of action,  
4 evidence for effectiveness and utilisation by patients and healthcare professionals.  
5 *Proc Nutr Soc* 2020;79(1):147–57 doi: 10.1017/S0029665119000934 [published Online  
6 First: 2 July 2019].
- 7  
8 68 Lynch E, Troob J, Lebwohl B, et al. Who uses probiotics and why? A survey study  
9 conducted among general gastroenterology patients. *BMJ Open Gastro*  
10 2021;8:e000742 doi: 10.1136/bmjgast-2021-000742
- 11  
12 69 Staudacher HM, Loughman A. Gut health: definitions and determinants. *Lancet*  
13 *Gastroenterol Hepatol* 2021;6(4):269 doi: 10.1016/S2468-1253(21)00071-6 [published  
14 Online First: 1 April 2021].
- 15  
16 70 Guo Q, Goldenberg JZ, Humphrey C, et al. Probiotics for the prevention of pediatric  
17 antibiotic-associated diarrhea. *Cochrane Database Syst Rev*. 2019;4:CD004827 doi:  
18 10.1002/14651858.CD004827.pub5
- 19  
20 71 Connell M, Shin A, James-Stevenson T, et al. Systematic review and meta-analysis:  
21 efficacy of patented probiotic, VSL#3, in irritable bowel syndrome. *Neurogastroenterol*  
22 *Motil* 2018;30(12):e13427 doi: 10.1111/nmo.13427
- 23  
24 72 Collinson S, Deans A, Padua-Zamora A, et al. Probiotics for treating acute infectious  
25 diarrhoea. *Cochrane Database Syst Rev* 2020;12(12):CD003048 doi:  
26 10.1002/14651858.CD003048.pub4
- 27  
28 73 Sharif S, Meader N, Oddie SJ, et al. Probiotics to prevent necrotising enterocolitis in  
29 very preterm or very low weight infants. *Cochrane Database Syst Rev*  
30 2020;10:CD005496 doi: 10.1002/14651858.CD005496
- 31  
32 74 McFarland LV, Evans CT, Goldstein EJC. Strain-specificity and disease-specificity of  
33 probiotic efficacy: a systematic review and meta-analysis. *Front Med (Lausanne)*  
34 2018;5:124 doi: 10.3389/fmed.2018.00124
- 35  
36 75 Nutrimedia. Mensajes evaluados. ¿Son los alimentos probióticos beneficiosos para  
37 la salud? 2021. Available: [https://www.upf.edu/web/nutrimedia/-/son-los-alimentos-  
38 probioticos-beneficiosos-para-la-salud-#.Yc39JRPmJm9](https://www.upf.edu/web/nutrimedia/-/son-los-alimentos-probioticos-beneficiosos-para-la-salud-#.Yc39JRPmJm9) [Accessed 10 Feb 2022].
- 39  
40 76 Kapp JM, Sumner W. Kombucha: a systematic review of the empirical evidence of  
41 human health benefit. *Ann Epidemiol* 2019;30:66–70 doi:  
42 10.1016/j.annepidem.2018.11.001 [published Online First: 10 November 2018].
- 43  
44 77 Reynolds A, Mann J, Cummings J, et al. Carbohydrate quality and human health: a  
45 series of systematic reviews and meta-analyses. *Lancet* 2019;393(10170):434–45 doi:  
46 10.1016/S0140-6736(18)31809-9 [published Online First: 2 February 2019].
- 47  
48 78 Shi Q, Tan L, Liu C, et al. Comparative efficacy of pharmacological and  
49 nonpharmacological treatments for chronic idiopathic constipation in China: a  
50 Bayesian network meta-analysis. *BMC Complement Altern Med* 2019;19(1):311 doi:  
51 10.1186/s12906-019-2741-z [published Online First: 14 November 2019].
- 52  
53 79 Gluud LL, Vilstrup H, Morgan MY. Non-absorbable disaccharides versus placebo/no  
54 intervention and lactulose versus lactitol for the prevention and treatment of hepatic  
55 encephalopathy in people with cirrhosis. *Cochrane Database Syst Rev*  
56 2016;5:CD003044 doi: 10.1002/14651858.CD003044.pub4
- 57  
58 80 Ostry A, Young ML, Hughes M. The quality of nutritional information available on  
59 popular websites: a content analysis. *Health Educ Res* 2008;23(4):648–55  
60 doi:10.1093/her/cym050 [published Online First: 25 September 2007].

- 1  
2  
3 81 Cooper BEJ, Lee WE, Goldacre BM, et al. The quality of the evidence for dietary  
4 advice given in UK national newspapers. *Public Underst Sci* 2012;21(6):664–73 doi:  
5 10.1177/0963662511401782 [published Online First: 11 April 2011].  
6  
7 82 Gholizadeh Z, Papi A, Ashrafi-rizi H, et al. Quality evaluation of Persian nutrition and  
8 diet therapy websites. *J Educ Health Promot* 2017;6:48 doi: 10.4103/jehp.jehp\_83\_14  
9  
10 83 Kininmonth AR, Jamil N, Almatrouk N, et al. Quality assessment of nutrition  
11 coverage in the media: a 6-week survey of five popular UK newspapers. *BMJ Open*  
12 2017;7:e014633 doi: 10.1136/bmjopen-2016-014633  
13  
14 84 El Jassar OG, El Jassar IN, Kritsotakis EI. Assessment of quality of information  
15 available over the internet about vegan diet. *Nutrition & Food Science*  
16 2019;49(6):1142–52 doi: 10.1108/NFS-02-2019-0044 [published Online First: 11  
17 November 2019].  
18  
19 85 European Union. Regulation (EU) No. 1924/2006 of the European Parliament and of  
20 the Council, of 20 December 2006, on nutrition and health claims made on foods.  
21 Available: <https://eur-lex.europa.eu/legal-content/en/ALL/?uri=CELEX%3A32006R1924>  
22 [Accessed 23 June 2022].  
23  
24 86 Royal Decree 1487/2009, of 26 September, concerning food supplements.  
25 Available: <https://www.boe.es/buscar/doc.php?id=BOE-A-2009-16109> [Accessed 23  
26 June 2022].  
27  
28 87 European Union. Regulation (EU) No. 1169/2011 of the European Parliament and of  
29 the Council, of 25 October 2011, on the provision of food information to consumers.  
30 Available: <https://eur-lex.europa.eu/legal-content/EN/ALL/?uri=celex%3A32011R1169>  
31 [Accessed 23 June 2022].  
32  
33 88 Hawkes C & World Health Organization. Marketing food to children: changes in the  
34 global regulatory environment, 2004-2006. 2007. Available:  
35 <https://apps.who.int/iris/handle/10665/43693> [Accessed 23 June 2022].  
36  
37 89 Montaña Blasco M, Jiménez-Morales M. Soft drinks and sugar-sweetened  
38 beverages advertising in Spain: correlation between nutritional values and advertising  
39 discursive strategies. *Int J Environ Res Public Health* 2020;17(7):2335. doi:  
40 10.3390/ijerph17072335  
41  
42 90 Montaña Blasco M, Jiménez-Morales M. Breakfast food advertising and prevention  
43 of obesity: analysis of the nutritional value of the products and discursive strategies  
44 used in the breakfast ads from 2015 to 2019. *Nutrients* 2021;13(1):231. doi:  
45 10.3390/nu13010231  
46  
47 91 Guzmán-Caro G, García López FJ, Royo-Bordonada MA. Conflicts of interest among  
48 scientific foundations and societies in the field of childhood nutrition. *Gac Sanit*  
49 2021;35(4):320–5 doi: 10.1016/j.gaceta.2020.03.008  
50  
51 92 Schwartz LM, Steven W. On the prevention and treatment of exaggeration. *J Gen*  
52 *Intern Med* 2003;18(2):153–4 doi: 10.1046/j.1525-1497.2003.21216.x  
53  
54 93 Reid G, Gadir AA, Dhir R. Probiotics: Reiterating what they are and what they are  
55 not. *Front Microbiol* 2019;10:424 doi: 10.3389/fmicb.2019.00424  
56  
57 94 Shanahan F, Hill C. Language, numeracy and logic in microbiome science. *Nat Rev*  
58 *Gastroenterol Hepatol* 2019;16(7):387–8 doi: 10.1038/s41575-019-0163-5 [published  
59 Online First: 5 June 2019].  
60  
95 Shanahan F, Ghosh TS, O'Toole PW. The healthy microbiome-What is the definition  
of a healthy gut microbiome? *Gastroenterology* 2021;160(2):483–94 doi:  
10.1053/j.gastro.2020.09.057

- 1  
2  
3 96 Casino G. Producers, communicators and consumers of 'risk'. *J Epidemiol*  
4 *Community Health* 2010;64(11):940 doi: 10.1136/jech.2008.084517 [published Online  
5 First: 30 August 2010].  
6  
7 97 Sender R, Fuchs S, Milo R. Revised estimates for the number of human and bacteria  
8 cells in the body. *PLoS Biol* 2016;14(8):e1002533 doi: 10.1371/journal.pbio.1002533  
9  
10 98 Hill C. Balancing the risks and rewards of live biotherapeutics. *Nat Rev Gastroenterol*  
11 *Hepatol* 2020;17(3):133–4 doi: 10.1038/s41575-019-0254-3 [published Online First: 23  
12 December 2019].  
13  
14 99 Bafeta A, Koh M, Riveros C, et al. Harms reporting in randomized controlled trials of  
15 interventions aimed at modifying microbiota: a systematic reviews. *Ann Intern Med*  
16 2018;169(4):240–7 doi: 10.7326/M18-0343 [published Online First: 17 July 2018].  
17  
18 100 Ferreira de Miranda J, Fernandes Ruiz L, Borges Silva C, et al. Kombucha: a review  
19 of substrates, regulations, composition, and biological properties. *J Food Sci* 2022;  
20 87(2):503–27 doi: 10.1111/1750-3841.16029 [published Online First: 14 January 2022].  
21  
22 101 Kim E, Kim D, Yang SM, et al. Validation of probiotic species or subspecies identity  
23 in commercial probiotic products using high-resolution PCR method based on large-  
24 scale genomic analysis. *Food Res Int* 2022;154:111011 doi:  
25 10.1016/j.foodres.2022.111011  
26  
27 102 Davidson SJ, Barrett HL, Price SA, et al. Probiotics for preventing gestational  
28 diabetes. *Cochrane Database Syst Rev* 2021;4(4):CD009951 doi:  
29 10.1002/14651858.CD009951.pub3  
30  
31 103 Besselink MGH, van Santvoort HC, Buskens E, et al. Probiotic prophylaxis in  
32 predicted severe acute pancreatitis: a randomised, double-blind, placebo-controlled  
33 trial. *Lancet* 2008;371(9613):651–9 doi: 10.1016/S0140-6736(08)60207-X  
34  
35 104 Alonso-Coello P, Schunemann HJ, Moher J, et al. [GRADE Evidence to Decision  
36 (EtD) frameworks: a systematic and transparent approach to making well informed  
37 healthcare choices. 1: Introduction]. *Gac Sanit* 2018;32(2):166.e1-e10 doi:  
38 10.1016/j.gaceta.2017.02.010 [published Online First: 17 August 2017].  
39  
40 105 Alonso-Coello P, Rigau D, Sanabria AJ, et al. Quality and strength: the GRADE  
41 system for formulating recommendations in clinical practice guidelines. *Arch*  
42 *Bronconeumol* 2013;49(6):261–7 doi: 10.1016/j.arbres.2012.12.001 [published Online  
43 First: 1 May 2013].  
44
- 

#### Legends of the figures cited within the main text:

45  
46  
47  
48  
49  
50 Figure 1. Online health claim topics portrayed for probiotics, yoghurt, kefir, kombucha,  
51 fibre and prebiotics.

52  
53  
54 Figure 2. Number of online health claims for probiotics, yoghurt, kefir, kombucha, fibre  
55 and prebiotics supported or not by evidence from systematic reviews (SRs).

56  
57  
58 Figure 3. Effect and certainty of evidence in systematic reviews supporting online health  
59 claims for probiotics, yoghurt, kefir, kombucha, fibre and prebiotics.  
60

1  
2  
3 Figure 4. Information quality score by intervention (A) and webpage typology (B). Data  
4 are reported as median and interquartile range. C, commercial; HP, health portal; N,  
5 news; NP, non-profit organisation; P, professional; SJ, scientific journal; G,  
6 governmental; O, other. \* $p < 0.05$  vs scientific journals according to a Kruskal-Wallis test.  
7  
8  
9  
10  
11  
12  
13  
14  
15  
16  
17  
18  
19  
20  
21  
22  
23  
24  
25  
26  
27  
28  
29  
30  
31  
32  
33  
34  
35  
36  
37  
38  
39  
40  
41  
42  
43  
44  
45  
46  
47  
48  
49  
50  
51  
52  
53  
54  
55  
56  
57  
58  
59  
60

For peer review only

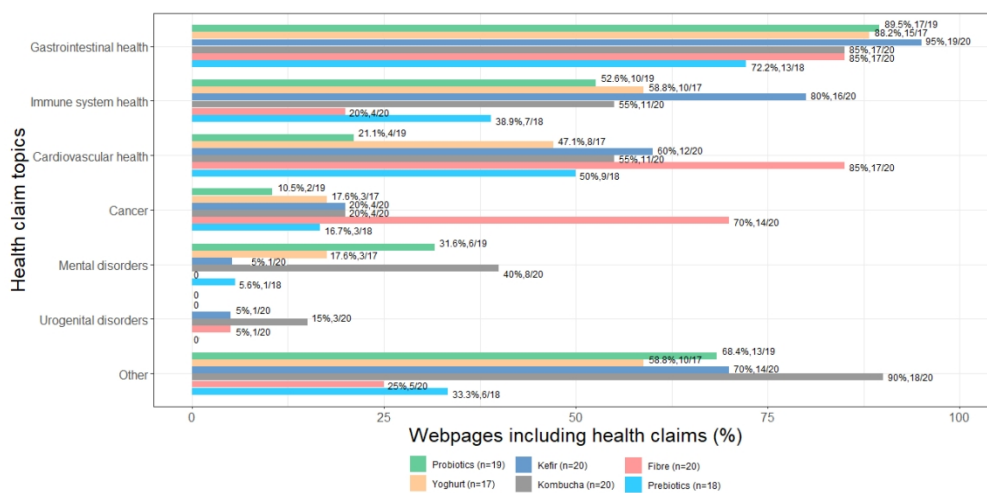

Figure 1. Online health claim topics portrayed for probiotics, yoghurt, kefir, kombucha, fibre and prebiotics.

109x56mm (300 x 300 DPI)



Figure 2. Number of online health claims for probiotics, yoghurt, kefir, kombucha, fibre and prebiotics supported or not by evidence from systematic reviews (SRs).

109x56mm (300 x 300 DPI)



| Topic                         | Health claim                  | # webs | Effect* | Certainty* | Topic                      | Health claim                | # webs | Effect* | Certainty* |
|-------------------------------|-------------------------------|--------|---------|------------|----------------------------|-----------------------------|--------|---------|------------|
| <b>Probiotics<sup>a</sup></b> |                               |        |         |            | <b>Yoghurt<sup>a</sup></b> |                             |        |         |            |
| Gastro                        | Antibiotic-assoc. diarrhoea   | 15     | +       | Moderate   | Gastro                     | Infectious diarrhoea        | 6      | ?       | Very low   |
| Gastro                        | Irritable bowel syndrome      | 13     | 0       | Low        | Gastro                     | Constipation <sup>b</sup>   | 5      | +       | Low        |
| Gastro                        | Infectious diarrhoea          | 11     | ?       | Very low   | Gastro                     | Antibiotic-assoc. diarrhoea | 4      | +       | Moderate   |
| Gastro                        | Ulcerative colitis            | 8      | ?       | Very low   | Gastro                     | Irritable bowel syndrome    | 3      | 0       | Low        |
| Gastro                        | Constipation <sup>b</sup>     | 7      | +       | Low        | Gastro                     | Abdominal distension        | 2      | 0       | Low        |
| Gastro                        | Crohn's disease               | 5      | 0       | Very low   | Gastro                     | Ulcerative colitis          | 1      | ?       | Very low   |
| Gastro                        | Abdominal distension          | 4      | 0       | Low        | Gastro                     | Crohn's disease             | 1      | 0       | Very low   |
| Gastro                        | Necrotising enterocolitis     | 4      | +       | Moderate   | Gastro                     | Necrotising enterocolitis   | 1      | +       | Moderate   |
| Gastro                        | Infantile colic               | 3      | +       | Low        | Immune                     | Otitis                      | 3      | +       | Moderate   |
| Gastro                        | Pouchitis                     | 3      | ?       | Very low   | Immune                     | Allergies                   | 1      | 0       | Very low   |
| Gastro                        | Non-alcoholic fatty liver     | 2      | ?       | Very low   | Cardio                     | Obesity                     | 6      | 0       | Very low   |
| Gastro                        | Tooth decay                   | 2      | +       | Low        | Cardio                     | Hypertension                | 2      | +       | Very low   |
| Gastro                        | Periodontal disease           | 2      | ?       | Very low   | Mental                     | Anxiety                     | 2      | ?       | Very low   |
| Gastro                        | <i>C. difficile</i> diarrhoea | 1      | +       | Low        | Mental                     | Depression                  | 2      | ?       | Very low   |
| Gastro                        | Hepatic encephalopathy        | 1      | +       | Low        | Mental                     | Alzheimer's disease         | 1      | 0       | Very low   |
| Immune                        | Allergies                     | 7      | 0       | Very low   | Other                      | Stress                      | 1      | 0       | Very low   |
| Immune                        | Vulvovaginal candidiasis      | 7      | +       | Very low   | Other                      | Abdominal pain              | 1      | 0       | Low        |
| Immune                        | Urinary tract infections      | 6      | 0       | Low        | Other                      | Upper respir. infections    | 1      | +       | Very low   |
| Immune                        | Otitis                        | 3      | +       | Moderate   | Other                      | Cystic fibrosis             | 1      | 0       | Low        |
| Cardio                        | Obesity                       | 2      | 0       | Very low   | Other                      | Reduction blood urea        | 1      | +       | Very low   |
| Cardio                        | Hypertension                  | 2      | +       | Very low   | <b>Kefir</b>               |                             |        |         |            |
| Cardio                        | Gestational diabetes          | 1      | 0       | Low        | Gastro                     | Ulcerative colitis          | 3      | ?       | Very low   |
| Mental                        | Anxiety                       | 4      | ?       | Very low   | <b>Fibre</b>               |                             |        |         |            |
| Mental                        | Depression                    | 3      | ?       | Very low   | Gastro                     | Constipation                | 17     | +       | Low        |
| Other                         | Eczema                        | 5      | ?       | Very low   | Gastro                     | Ulcerative colitis          | 1      | ?       | Very low   |
| Other                         | Upper respir. infections      | 6      | +       | Very low   | Gastro                     | Crohn's disease             | 1      | ?       | Very low   |
| Other                         | Stress                        | 2      | 0       | Very low   | Cardio                     | Cholesterol reduction       | 17     | +       | High       |
| Other                         | Asthma                        | 1      | 0       | Very low   | Cardio                     | Glycaemic control           | 17     | +       | Low        |
| Other                         | Mastitis                      | 1      | ?       | Low        | Cardio                     | Obesity                     | 15     | +       | Moderate   |
| <b>Prebiotics</b>             |                               |        |         |            | Cardio                     | Type 2 diabetes             | 5      | +       | Moderate   |
| Gastro                        | Constipation <sup>b</sup>     | 11     | +       | Low        | Cardio                     | Cardiovascular mortality    | 3      | +       | Moderate   |
| Gastro                        | Infectious diarrhoea          | 6      | +       | Moderate   | Cardio                     | Triglyceride reduction      | 3      | +       | High       |
| Gastro                        | Hepatic encephalopathy        | 3      | +       | Moderate   | Cardio                     | Hypertension                | 2      | +       | Moderate   |
| Gastro                        | Non-alcoholic fatty liver     | 2      | ?       | Very low   | Cardio                     | Coronary heart disease      | 1      | +       | Moderate   |
| Gastro                        | Radiotherapy diarrhoea        | 1      | ?       | Uncertain  | Cancer                     | Colorectal cancer           | 12     | +       | Moderate   |
| Immune                        | Allergies                     | 1      | 0       | Very low   | Other                      | Anti-inflammatory           | 2      | +       | Moderate   |
| Other                         | Eczema                        | 1      | 0       | Uncertain  |                            |                             |        |         |            |

\*Derived from conclusions of systematic reviews. +, favourable effect; 0, no effect; ?, uncertain effect.  
<sup>a</sup>Probiotics in the form of foods (fermented milks containing probiotic bacteria) and supplements were analysed together in the SRs consulted.  
<sup>b</sup>Outcomes reported by probiotics combined with lactulose.

Figure 3. Effect and certainty of evidence in systematic reviews supporting online health claims for probiotics, yoghurt, kefir, kombucha, fibre and prebiotics.

92x100mm (300 x 300 DPI)

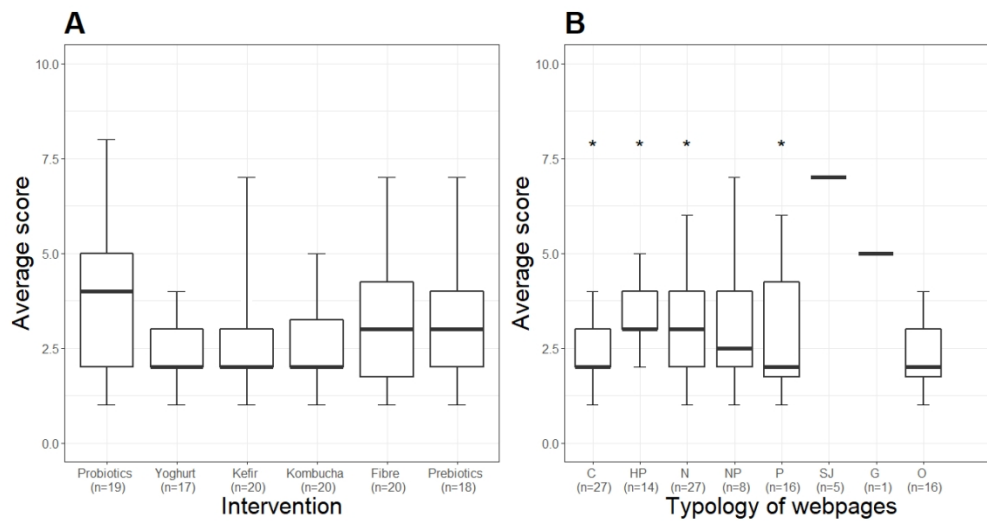

Figure 4. Information quality score by intervention (A) and webpage typology (B). Data are reported as median and interquartile range. C, commercial; HP, health portal; N, news; NP, non-profit organisation; P, professional; SJ, scientific journal; G, governmental; O, other. \* $p < 0.05$  vs scientific journals according to a Kruskal-Wallis test.

109x56mm (300 x 300 DPI)
